1           **GENOME WIDE ASSOCIATION ANALYSES BASED ON**  
2           **BROADLY DIFFERENT SPECIFICATIONS FOR PRIOR**  
3           **DISTRIBUTIONS, GENOMIC WINDOWS, AND ESTIMATION**  
4           **METHODS**

5  
6                           Chunyu Chen, Juan P. Steibel and Robert J. Tempelman

7  
8           Department of Animal Science, Michigan State University, East Lansing, Michigan 48824

9  
10   **Running title:** Strategies for genome wide association

11  
12   **Key Words:** genome-wide association, hierarchical Bayesian, variable selection

13  
14   Corresponding author: Chunyu Chen, 1205 Anthony Hall, Michigan State University. Phone:  
15   (517) 897-5776. e-mail: [chench57@msu.edu](mailto:chench57@msu.edu)

17

## ABSTRACT

18 A popular strategy (EMMAX) for genome wide association (GWA) analysis fits all marker  
19 effects as classical random effects (i.e., Gaussian prior) by which association for the specific  
20 marker of interest is inferred by treating its effect as fixed. It seems more statistically coherent to  
21 specify all markers as sharing the same prior distribution, whether it is Gaussian, heavy-tailed  
22 (BayesA), or has variable selection specifications based on a mixture of, say, two Gaussian  
23 distributions (SSVS). Furthermore, all such GWA inference should be formally based on  
24 posterior probabilities or test statistics as we present here, rather than merely being based on  
25 point estimates. We compared these three broad categories of priors within a simulation study  
26 to investigate the effects of different degrees of skewness for quantitative trait loci (QTL) effects  
27 and numbers of QTL using 43,266 SNP marker genotypes from 922 Duroc-Pietrain F2 cross  
28 pigs. Genomic regions were based either on single SNP associations, on non-overlapping  
29 windows of various fixed sizes (0.5 to 3 Mb) or on adaptively determined windows that cluster  
30 the genome into blocks based on linkage disequilibrium (LD). We found that SSVS and BayesA  
31 lead to the best receiver operating curve properties in almost all cases. We also evaluated  
32 approximate marginal a posteriori (MAP) approaches to BayesA and SSVS as potential  
33 computationally feasible alternatives; however, MAP inferences were not promising, particularly  
34 due to their sensitivity to starting values. We determined that it is advantageous to use variable  
35 selection specifications based on adaptively constructed genomic window lengths for GWA  
36 studies.

37

## SUMMARY

38 Genome wide association (GWA) analyses strategies have been improved by  
39 simultaneously fitting all marker effects when inferring upon any single marker effect, with the  
40 most popular distributional assumption being normality. Using data generated from 43,266  
41 genotypes on 922 Duroc-Pietrain F2 cross pigs, we demonstrate that GWA studies could  
42 particularly benefit from more flexible heavy-tailed or variable selection distributional  
43 assumptions. Furthermore, these associations should not just be based on single markers or even  
44 genomic windows of markers of fixed physical distances (0.5 – 3.0 Mb) but based on adaptively  
45 determined genomic windows using linkage disequilibrium information.

46

## INTRODUCTION

47 Recent developments in genotyping technology have made single nucleotide  
48 polymorphism (SNP) genotype marker panels, based on thousands, and now millions, of  
49 markers, available for many livestock species (Wiggans *et al.* 2013; Kemper *et al.* 2015).  
50 Genome wide association (GWA) analyses have been increasingly used to help pinpoint regions  
51 containing potential causal variants or quantitative trait loci (QTL) for economically important  
52 phenotypes based on fitting SNP markers as covariates. An increasingly popular inferential  
53 approach for GWA is based on fitting phenotypes as a joint linear function of all markers using  
54 mixed-model procedures such as those invoked in the popular EMMAX procedure (Kang *et al.*  
55 2010) and other similar procedures (Lippert *et al.* 2011; Zhou and Stephens 2012). Jointly  
56 accounting for all SNP effects when inferring upon a specific SNP marker of interest generally  
57 improves precision and power while also accounting for potential population structure (Kang *et*  
58 *al.* 2008).

59 Now GWA inferences in EMMAX and related procedures are based on treating the  
60 effect of the SNP marker of interest as fixed with all other marker effects as normally distributed  
61 random effects, noting that this process is repeated in turn for every single marker. These “fixed  
62 effects” hypothesis tests are based on generalized least squares (GLS) inference, with *P*-values  
63 being subsequently adjusted for the total number of markers or tests. Goddard *et al.* (2016) have  
64 recently pointed out the paradox with of treating markers as fixed for inference but then  
65 otherwise as random to account for population structure for inference on association with other  
66 markers. Random effects modeling with all SNP effects treated as random, including the one of

67 inferential interest, is synonymous with shrinkage based inference. Shrinkage or posterior  
68 inference has been demonstrated to facilitate reliable inference without any formal requirements  
69 for multiple comparison adjustments (Gelman *et al.* 2012). However, with SNP markers treated  
70 as identically and independently distributed variables from a Gaussian distribution, the resulting  
71 shrinkage from random effects modeling can be too “hard”, particularly with greater marker  
72 densities (Hayes 2013). Subsequently, this random effects test has been deemed to be far too  
73 conservative in various applications, as further demonstrated by Gualdron Duarte *et al.* (2014).

74 Prior specifications that are sparser than Gaussian may be more important for GWA since  
75 they more likely better characterize the true genetic architecture of most traits relative to  
76 Gaussian priors (de Los Campos *et al.* 2013). Sparser specifications have already been  
77 popularized in whole genome prediction (**WGP**), such as the Student *t* distribution used in  
78 BayesA (Meuwissen *et al.* 2001) and stochastic search and variable selection or SSVS (George  
79 and McCulloch 1993; Verbyla *et al.* 2009). Both specifications generally lead to far less  
80 shrinkage of large effects yet greater shrinkage of small effects compared to a Gaussian prior. In  
81 particular, the use of variable selection procedures facilitate the determination of posterior  
82 probabilities of association (**PPA**), whose control may be far more effective in maximizing both  
83 sensitivity and specificity of GWA (Fernando *et al.* 2014) compared to frequentist based  
84 inferences which require adjustments for multiple testing such as with EMMAX. Another  
85 common inferential strategy in GWA is to report the percent of variance explained by a marker  
86 or marker region (Fernando and Garrick 2013). However, point estimates of marker effects or  
87 percentage of variation explained, by themselves, do not provide formal evidence of association.

88 Most sparse prior WGP models have been implemented using Markov chain Monte Carlo  
89 (**MCMC**), which can be computationally expensive. Approximate analytical approaches based  
90 on the expectation–maximization (**EM**) algorithm to provide approximate maximum a posteriori  
91 (**MAP**) estimates of SNP effects have been developed to address computational limitations in  
92 these sparse prior WGP models (Meuwissen *et al.* 2009; Hayashi and Iwata 2010; Sun *et al.*  
93 2012; Chen and Tempelman 2015). Strategies for estimating hyperparameters for MAP inference  
94 have been proposed, including those proposed by Karkkainen and Sillanpaa (2012) and Chen and  
95 Tempelman (2015), the latter adapting the average information restricted maximum likelihood

96 (AIREML) algorithm for estimating hyperparameters in BayesA and SSVS specifications.  
97 These MAP implementations should also be assessed for their efficacy in GWA studies.

98 A pragmatic first objective in GWA is to pinpoint narrow genomic regions containing  
99 QTL rather than to specifically identify the QTL themselves, even though the latter is the  
100 ultimate goal. That is, a large number of SNP markers in a region surrounding a typically  
101 untyped QTL might be in high linkage disequilibrium (LD) with the QTL and with each other,  
102 thereby thwarting precise inference on the causal QTL. Different GWA methods may differ in  
103 the number of SNP markers inferred to have an association within a genomic region with, for  
104 example, EMMAX tending to draw associations with more SNP markers in LD with a QTL  
105 compared to use of SSVS (Guan and Stephens 2011; Goddard *et al.* 2016).

106 Increasingly, more GWA studies are based on inferences involving joint tests on all of  
107 the SNP markers within a narrow genomic region, recognizing that single SNP marker  
108 associations may be fraught by low statistical power or problems with multicollinearity or both  
109 (Fernando *et al.*, 2014). Some GWA studies have been based on using several arbitrary window  
110 sizes based on either non-overlapping (Wolc *et al.* 2012; Moser *et al.* 2015; Wolc *et al.* 2016) or  
111 sliding windows (Schmid and Yang 2008). Because of the arbitrariness of fixed window sizes,  
112 whether defined by number of SNP markers or by physical length in base pairs, it is possible to  
113 split a large LD block into 2 or more separate windows, thereby making such a division  
114 seemingly suboptimal for GWA. Substantially different window lengths have been used in  
115 different studies. For example, a 5 SNP window was used for GWA based on 51,385 SNP  
116 markers in pigs (Fan *et al.* 2011), whereas a 250 kilo base (**Kb**) window was used for 287,854  
117 SNPs from the Wellcome Trust Case Control Consortium (WTCCC) human data (Wellcome  
118 Trust Case Control 2007; Moser *et al.* 2015), and a 1 mega base (**Mb**) window was used for a  
119 24,425 SNP marker panel in chickens (Wolc *et al.* 2012). Dehman *et al.* (2015) recently  
120 proposed an approach to adaptively cluster windows of SNP markers of varying sizes based on  
121 LD relationships. That is, they performed spatially constrained hierarchical clustering of SNPs  
122 by minimizing a distance measure derived from Ward's criterion based on LD  $r^2$  between SNP  
123 markers. They surmised that this procedure would estimate a suitable specification of genomic  
124 windows within each chromosome using a modified version of the gap statistic. This method has  
125 been implemented in the R package BALD (Dehman and Neuvial 2015).

126 We had three primary objectives in this study. One was to examine the potential benefits  
127 of using sparser priors (i.e., BayesA and SSVS) relative to classical (i.e., based on normality)  
128 random effects specifications and strategies for GWA under a wide range of simulated  
129 architectures. A second objective was to assess whether the choice of different fixed genomic  
130 window sizes (specifically 0.5, 1, 2, and 3 Mb), versus adaptively inferred window sizes based  
131 on LD clustering, could impact GWA performance. A final objective was to assess the relative  
132 merit of approximate MAP approaches to theoretically exact yet computationally intensive  
133 MCMC approaches based on sparse prior specifications. Our assessments are based upon SNP  
134 marker genotypes and actual and simulated phenotypes on F2 pigs deriving from a Duroc-  
135 Pietrain cross.

136

## 137 **METHODS and MATERIALS**

### 138 *The hierarchical linear model*

139 All analyses in this paper are based on a hierarchical linear model which be characterized by the  
140 classical mixed model specification:

$$141 \quad \mathbf{y} = \mathbf{X}\boldsymbol{\beta} + \mathbf{Z}\mathbf{g} + \mathbf{e} \quad [1]$$

142 Here  $\mathbf{y}$  is a  $n \times 1$  vector of phenotypes,  $\mathbf{X}$  is a known  $n \times p$  incidence matrix connecting  $\mathbf{y}$  to the  
143  $p \times 1$  vector of unknown fixed effects  $\boldsymbol{\beta}$ ,  $\mathbf{Z}$  is a known  $n \times m$  matrix of genotypes connecting  $\mathbf{y}$  to  
144 the  $m \times 1$  vector of unknown random SNP marker effects  $\mathbf{g}$ , and  $\mathbf{e}$  is the random error vector.

145 We also assume throughout that  $\mathbf{e} \sim N(0, \mathbf{I}\sigma_e^2)$  whereas  $\mathbf{g} | \sigma_g^2, \mathbf{D} \sim N(0, \mathbf{D}\sigma_g^2)$  for  $\mathbf{D}$  being a  
146 diagonal matrix of augmented data or variables (Chen and Tempelman 2015; Tempelman 2015).  
147 The prior specification on these diagonal elements is used to distinguish each of the competing  
148 models as described later.

149 For pedagogical reasons, we assume one record per individual although extensions to repeated  
150 records per individual are possible. An equivalent genomic animal effects model (VanRaden  
151 2008) to Equation [1] can then be written as:

$$152 \quad \mathbf{y} = \mathbf{X}\boldsymbol{\beta} + \mathbf{a} + \mathbf{e} \quad [2]$$

153 with  $\mathbf{a} = \mathbf{Zg}$  and all other terms defined previously as in [1] such that, conditionally on  $\mathbf{D}$ ,

$$154 \quad \text{var}(\mathbf{a}) = \text{var}(\mathbf{Zg}) = \mathbf{Z} \text{var}(\mathbf{g}) \mathbf{Z}' = \mathbf{ZDZ}' \sigma_g^2 \quad [3]$$

155 If  $m \gg n$ , it is generally computationally more tractable to work with the linear mixed model in  
 156 Equation [2], along with the random effects specification in Equation [3], then back solve for the  
 157 estimate of  $\mathbf{g}$  that would be identical to those using a linear mixed model directly based on  
 158 Equation [1] (Stranden and Garrick 2009).

### 159 *Models*

160 In the simplest model, which we denote as ridge regression (RR), there is no such data  
 161 augmentation (i.e.  $\mathbf{D} = \mathbf{I}$ ), such that the elements of  $\mathbf{g}$  are marginally distributed as independent  
 162 normal (de Los Campos *et al.* 2013). Sparser distributional specifications on  $\mathbf{g}$  can be  
 163 constructed as mixtures of normal densities (Andrews and Mallows 1974) by simply specifying  
 164 prior distributions on functions of the diagonal elements of  $\mathbf{D}$ . Suppose that  $\mathbf{D} = \text{diag} \{ \tau_j \}_{j=1}^m$   
 165 with  $\tau_j \sim \chi^{-2}(v_\tau, v_\tau)$ ; then it can be demonstrated that, marginally, elements of  $\mathbf{g}$  are identically  
 166 and independently distributed as a scaled Student  $t$  with scale parameter  $\sigma_g^2$  and degrees of  
 167 freedom  $v_\tau$  (Chen and Tempelman 2015). This model is typically referred to as BayesA  
 168 (Meuwissen *et al.* 2001). Alternatively, if  $\mathbf{D} = \text{diag} \{ \tau_j + (1 - \tau_j) / c \}_{j=1}^m$  where  
 169  $\tau_j \sim \text{Bernoulli}(\pi_\tau)$ ;  $\tau_j = 0, 1$  and  $c \gg 1$ , then the resulting model is Bayes SSVS in the spirit of  
 170 George and McCulloch (1993). As a side-note, we use  $c = 1000$  for all SSVS analyses in this  
 171 paper.

172 As a final stage in each of the competing hierarchical models (RR, BayesA, and SSVS),  
 173 we specify convenient conjugate priors wherever possible. For example, scaled inverted chi-  
 174 square priors for variance components; i.e.

$$175 \quad p(\sigma_e^2 | v_e, s_e^2) \propto (\sigma_e^2)^{-\left(\frac{v_e}{2} + 1\right)} e^{-\frac{v_e s_e^2}{2\sigma_e^2}} \quad [4]$$

176 and

$$177 \quad p(\sigma_g^2 | \nu_g, s_g^2) \propto (\sigma_g^2)^{-\left(\frac{\nu_g}{2}+1\right)} e^{-\frac{\nu_g s_g^2}{2\sigma_g^2}} \quad [5]$$

178 whereas we specify a Beta prior on  $\pi_\tau$  in SSVS; i.e.,

$$179 \quad p(\pi_\tau | \alpha_0, \beta_0) \propto \pi_\tau^{\alpha_0} (1 - \pi_\tau)^{\beta_0}. \quad [6]$$

180 As we explain later, we arbitrarily specify  $\nu_\tau$  as known ( $\nu_\tau=2.5$ ), although conceptually it could  
 181 also be estimated (Yang *et al.* 2015). We assume throughout that  $p(\boldsymbol{\beta}) \propto 1$  as  $p(\boldsymbol{\beta})$  is typically  
 182 diffuse, although extensions to more informative specifications should be obvious. Furthermore,  
 183 for all analyses in this paper, we specify Gelman's non-informative prior (Gelman 2006) for  $\sigma_e^2$   
 184 in Equation [4] based on  $\nu_e = -1$  and  $s_e^2 = 0$  and for  $\sigma_g^2$  in Equation [5] based on  $\nu_g = -1$  and  
 185  $s_g^2 = 0$ . Furthermore, as per Yang and Tempelman (2012), we specify  $\alpha_0 = 1$  and  $\beta_0 = 9$ .

186

### 187 ***Joint posterior density***

188 Given the specifications above, the joint posterior density can be written as in Equation [7]

$$189 \quad p(\boldsymbol{\beta}, \mathbf{g}, \boldsymbol{\tau}, \sigma_e^2, \sigma_g^2, \theta_\tau | \mathbf{y}) \\ \propto \left( \prod_{i=1}^n p(y_i | \boldsymbol{\beta}, \mathbf{g}, \sigma_e^2) \right) \left( \prod_{j=1}^m p(g_j | \sigma_g^2, \tau_j) p(\tau_j | \theta_\tau) \right) p(\boldsymbol{\beta}) p(\sigma_g^2 | \nu_g, s_g^2) p(\sigma_e^2 | \nu_e, s_e^2) p(\theta_\tau) \quad [7]$$

190 Note that  $p(\tau_j | \theta_\tau)$  specifies the  $\chi^{-2}(\nu_\tau, \nu_\tau)$  density under BayesA (i.e.,  $\theta_\tau \equiv \nu_\tau$ ) whereas

191  $p(\tau_j | \theta_\tau)$  specifies the *Bernoulli*( $\pi_\tau$ ) density under SSVS (i.e.,  $\theta_\tau \equiv \pi_\tau$ ). Furthermore,

192  $p(g_j | \sigma_g^2, \tau_j)$  is Gaussian with null means under all three competing models but with variance

193  $\sigma_g^2 \tau_j$  under BayesA and variance  $\sigma_g^2 (\tau_j + (1 - \tau_j) / c)$  under SSVS. For RR,  $\tau_j = 1 \forall j$  such

194 that  $p(g_j | \sigma_g^2, \tau_j = 1)$  is Gaussian with common variance  $\sigma_g^2 \forall j$ .

195



196 **Algorithms**

197 *Markov Chain Monte Carlo*

198 The MCMC sampling strategies that we use here for BayesA are similar to those  
 199 provided in Yang and Tempelman (2012) and Yang *et al.* (2015). However, since our  
 200 parameterization is slightly different, we present the full conditional densities of interest for  
 201 implementing BayesA in Supplementary File S1. For similar reasons, we also provide the full  
 202 conditional densities for SSVS in Supplementary File S1 as even our model differs from the  
 203 model also labeled as SSVS in the genomic prediction work of Verbyla *et al.* (2009) whereas it is  
 204 virtually identical to the model presented in seminal SSVS paper by George and McCulloch  
 205 (1993).

206

207 *Maximum a posterior estimation*

208 Complete details on our MAP procedure for both BayesA and SSVS are found in Chen  
 209 and Tempelman (2015). Given that our application involved  $m \gg n$ , we conducted MAP based  
 210 inference on an equivalent animal-centric model using Equation [2] rather than based on a SNP  
 211 effects model as in Equation [1]. Details on backsolving from an animal centric model to  
 212 provide estimates of SNP effects are provided in Supplementary File S1. For pedagogical  
 213 reasons, however, we work directly from the SNP-centric Model [1] in our subsequent  
 214 developments. Conditional on  $\mathbf{D}$ , the posterior variance-covariance matrix of  $\mathbf{g}$ , or equivalently  
 215 its prediction error variance-covariance (PEV) matrix from a frequentist viewpoint, can be  
 216 written as:  $\text{var}(\mathbf{g} | \mathbf{y}, \mathbf{D}, \sigma_g^2, \sigma_e^2, \theta_\tau) = \mathbf{C}^{gg|\mathbf{D}}$ . This expression can be derived from the inverse of  
 217 the mixed model coefficient matrix as provided in Equation [8].

218 
$$\begin{bmatrix} \mathbf{C}^{\beta\beta|\mathbf{D}} & \mathbf{C}^{\beta\mathbf{g}|\mathbf{D}} \\ \mathbf{C}^{\mathbf{g}\beta|\mathbf{D}} & \mathbf{C}^{gg|\mathbf{D}} \end{bmatrix} = \begin{bmatrix} \mathbf{X}'\mathbf{X}\sigma_e^{-2} & \mathbf{X}'\mathbf{Z}\sigma_e^{-2} \\ \mathbf{Z}'\mathbf{X}\sigma_e^{-2} & \mathbf{Z}'\mathbf{Z}\sigma_e^{-2} + \mathbf{D}^{-1}\sigma_g^{-2} \end{bmatrix}^{-1} \quad [8]$$

219 That is,  $\mathbf{C}^{gg|\mathbf{D}}$  is the random by random portion of the inverse coefficient matrix in Henderson's  
 220 mixed model equations, conditional on  $\mathbf{D}$ ,  $\sigma_e^2$ ,  $\sigma_g^2$  and  $\theta_\tau$  ( $\theta_\tau \equiv v_\tau$  for BayesA or  $\theta_\tau \equiv \pi_\tau$  for  
 221 SSVS). As noted earlier, values for hyperparameters such as  $\sigma_e^2$ ,  $\sigma_g^2$  and  $\theta_\tau$  required for

222 Equation [8] can be determined using the REML or marginal maximum likelihood (MML)  
 223 estimation strategies as described by Chen and Tempelman (2015) noting that we choose to fix  
 224  $\nu_\tau$  in BayesA as indicated earlier.

225 It can be readily demonstrated (Sorensen and Gianola 2002), that asymptotically  
 226  $\text{MAP}(\mathbf{g}) \approx \text{E}(\mathbf{g} | \mathbf{y})$  whereby  $\text{MAP}(\mathbf{g})$  can be iteratively determined using EM based on Newton-  
 227 Raphson for maximization (M-) steps interwoven with expectation (E-) steps on elements of  $\mathbf{D}$   
 228 (Chen and Tempelman, 2015). Under RR,  $\mathbf{D} = \mathbf{I}$  such that  $\mathbf{C}^{\text{gg}} = \mathbf{C}^{\text{gg}|\mathbf{D}} \approx \text{var}(\mathbf{g} | \mathbf{y})$  represents the  
 229 posterior variance-covariance matrix of  $\mathbf{g}$  conditional on  $\sigma_e^2$ ,  $\sigma_g^2$  and  $\theta_\tau$ . In fact,  $\text{MAP}(\mathbf{g})$  is  
 230 synonymous with BLUP( $\mathbf{g}$ ) under RR. Furthermore,  $\mathbf{C}^{\text{gg}}$  is synonymous with the  $\mathbf{g}$ -component  
 231 of the inverse of the negative of the Hessian of the log of the joint conditional posterior density  
 232 of  $\boldsymbol{\beta}$  and  $\mathbf{g}$ . This posterior density is formally defined in Equation [9].

$$233 \quad p(\boldsymbol{\beta}, \mathbf{g}, | \sigma_e^2, \sigma_g^2, \theta_\tau | \mathbf{y}) \propto \left( \prod_{i=1}^n p(y_i | \boldsymbol{\beta}, \mathbf{g}, \sigma_e^2) \right) \left( \prod_{j=1}^m \int_{R_{\tau_j}} p(g_j | \sigma_g^2, \tau_j) p(\tau_j | \theta_\tau) d\tau_j \right) \quad [9]$$

234 With  $\mathbf{D} = \mathbf{I}$ , there is no uncertainty on  $\tau_j$  such the integration in Equation [9] is not necessary  
 235 with  $\mathbf{C}^{\text{gg}}$  being directly obtainable for RR using Equation [8]. However, for BayesA and SSVS,  
 236 uncertainty in  $\mathbf{D}$  needs to be integrated out as per Equation [9]. An indirect strategy for  
 237 asymptotically providing  $\mathbf{C}^{\text{gg}}$  for BayesA and SSVS is based on the strategy proposed by Louis  
 238 (1982) with details provided in Supplementary File S1. We subsequently use elements of  $\mathbf{C}^{\text{gg}}$  to  
 239 asymptotically determine key components of  $\text{var}(\mathbf{g} | \mathbf{y})$  for both single SNP and window based  
 240 GWA testing using MAP under all three models, noting again that MAP and BLUP are  
 241 synonymous under RR.

242

## 243 *Conducting Genome Wide Association Analyses*

### 244 *Single SNP marker associations*

245 We subsequently describe how we conducted GWA inference for single SNP  
 246 associations based on the algorithms (MCMC vs. MAP) and models (RR, BayesA, and SSVS).  
 247 With respect to inference on association on SNP  $j$ , EMMAX is conceptually based on subsetting  
 248 out Equation [1] as follows:

$$249 \quad \mathbf{y} = \mathbf{X}\boldsymbol{\beta} + \mathbf{z}_j g_j + \mathbf{Z}_{-j} \mathbf{g}_{-j} + \mathbf{e} \quad [10]$$

250 That is,  $\mathbf{Z}$  is partitioned into column  $j$ ,  $\mathbf{z}_j$ , being the genotypes for SNP  $j$  and all other remaining  
 251 columns in  $\mathbf{Z}_{-j}$ . In EMMAX,  $g_j$  is actually treated as fixed whereas  $\mathbf{g}_{-j}$  is treated as classically  
 252 random; i.e., characterized by a Gaussian prior distribution. Writing  $\mathbf{W}_j = \begin{bmatrix} \mathbf{X} & \mathbf{z}_j \end{bmatrix}$  and  
 253  $\mathbf{V}_{-j} = \mathbf{Z}_{-j} \mathbf{Z}_{-j}' \sigma_g^2 + \mathbf{I} \sigma_e^2$ , the generalized least squares (GLS) estimator  $\hat{g}_j$  of  $g_j$ , using all other  
 254 markers to account for population structure, is the last element of the product  
 255  $(\mathbf{W}_j' \mathbf{V}_{-j}^{-1} \mathbf{W}_j)^{-1} \mathbf{W}_j' \mathbf{V}_{-j}^{-1} \mathbf{y}$ . Furthermore, the corresponding standard error  $se(\hat{g}_j)$  is  
 256 determined by the square root of the last diagonal element of  $(\mathbf{W}_j' \mathbf{V}_{-j}^{-1} \mathbf{W}_j)^{-1}$ . The test-statistic  
 257 or “fixed effects”  $z$ -score for the EMMAX test can then be simply written as:

$$258 \quad z_f = \frac{\hat{g}_j}{se(\hat{g}_j)} \quad [11]$$

259 which is assumed to be  $N(0,1)$  under  $H_0: g_j = 0$ . The “expedited” approach (Kang *et al.* 2010)  
 260 in EMMAX, that we consider in this paper, is based on approximating  $\mathbf{V}_{-j}$  with  
 261  $\mathbf{V} = \mathbf{Z}\mathbf{Z}' \sigma_g^2 + \mathbf{I} \sigma_e^2$  for inference of association on all SNP  $j=1,2,\dots,m$ ; furthermore,  $\sigma_g^2$  and  $\sigma_e^2$   
 262 estimated only once using REML in an initial analysis that treats all SNP marker effects as  
 263 random. A GWA test for a particular SNP marker  $j$  using EMMAX then essentially involves  
 264 treating its effect jointly as both fixed and random by replacing  $\mathbf{Z}_{-j} \mathbf{g}_{-j}$  with  $\mathbf{Z}\mathbf{g}$  on the right  
 265 side of Equation [10], implying that this double counting of  $g_j$  as both fixed and random is  
 266 trivial with large  $m$ .

267 A classical random effects test is based on treating all SNP effects, including a marker  $j$   
 268 of particular interest, as having a Gaussian prior such that the point estimate of the SNP

269 substitution effect is based on fitting Equation [1] or, equivalently, backsolving from fitting  
 270 Equation [3] as demonstrated by Strandén and Garrick (2009) and also in Supplementary File S1.  
 271 A corresponding test statistic ( $z_r$ ) can be based on dividing  $\tilde{g}_j$ , the BLUP of  $g_j$ , by the square  
 272 root of its prediction error variance (*PEV*) where  $PEV(\tilde{g}_j) = \text{var}(\tilde{g}_j - g_j)$  from a frequentist  
 273 perspective. From a Bayesian perspective, the corresponding test statistic can be interpreted as a  
 274 posterior  $z$ -score (Gelman *et al.* 2012) since  $\tilde{g}_j$  is analogous to a posterior mean (i.e.,  
 275  $\tilde{g}_j = E(g_j | \mathbf{y}, \hat{\sigma}_e^2, \hat{\sigma}_g^2) \approx E(g_j | \mathbf{y})$ ) whereas the *PEV* is analogous to a posterior variance with  
 276  $PEV(\tilde{g}_j) = \text{var}(g_j | \mathbf{y}, \hat{\sigma}_e^2, \hat{\sigma}_g^2) \approx \text{var}(g_j | \mathbf{y})$ . We refer to this inference strategy as **RR-**  
 277 **BLUP**. It is important to indicate, nevertheless, that these RR-BLUP inferences are empirical  
 278 Bayesian (Robinson 1991) since these posterior means and variances are typically conditioned  
 279 upon REML estimates of  $\sigma_e^2$  and  $\sigma_u^2$ . The posterior  $z$ -score (Gelman *et al.* 2012) can then  
 280 equivalently derived from both frequentist and Bayesian perspectives as indicated in Equation  
 281 [12].

$$282 \quad z_r = \frac{\tilde{g}_j}{\sqrt{PEV(\tilde{g}_j)}} = \frac{E(g_j | \mathbf{y})}{\sqrt{\text{var}(g_j | \mathbf{y})}} \quad [12]$$

283 Now Gualdron Duarte *et al.* (2014), with a proof provided later by Bernal Rubio *et al.*  
 284 (2016), determined that the “fixed effects” or EMMAX  $z$ -score,  $z_f$  in Equation [11], could be  
 285 equivalently derived by treating all markers as classically random, but by dividing the  
 286 corresponding BLUP  $\tilde{g}_j$  for marker  $j$  by the square root of its frequentist definition of variance  
 287  $\text{var}(\tilde{g}_j)$  as characterized by classical mixed model theory (Searle *et al.* 1992) in Equation [13].

$$288 \quad \text{var}(\tilde{g}_j) = \text{var}(g_j) - PEV(\tilde{g}_j) = \sigma_g^2 - PEV(\tilde{g}_j) \quad [13]$$

289 In other words, one can rewrite the fixed effects test provided in both its frequentist (numerator  
 290 =  $\tilde{g}_j$ ) and Bayesian (numerator =  $E(g_j | \mathbf{y})$ ) representations as in Equation [14].

291 
$$z_f = \frac{\tilde{g}_j}{\sqrt{\sigma_g^2 - PEV(\tilde{g}_j)}} = \frac{E(g_j | \mathbf{y})}{\sqrt{\sigma_g^2 - \text{var}(g_j | \mathbf{y})}}. \quad [14]$$

292 Note that the determination using Equation [14] is computationally far more tractable than that in  
293 Equation [11]. That is, Equation [14] only requires computing BLUP of  $\mathbf{g}$  and its corresponding  
294 PEV in one single step determination for all  $m$  tests whereas Equation [11] imply  $m$  different  
295 mixed model analyses, each one in turn explicitly treating a different SNP marker effect as fixed.

296 We perceive no computationally tractable “fixed effects” test analogous to EMMA that  
297 we could adapt for MAP based on sparser priors (BayesA and SSVS). For BayesA, for example,  
298 this would entail treating the marker of interest  $j$  as fixed with all other markers treated as scaled  
299 Student  $t$ - distributed. However, a posterior or random effects  $z$ -score test can be constructed  
300 using the MAP estimate of  $g_j$  as the numerator and its asymptotic posterior standard error as the  
301 denominator, noting that MAP and the posterior mean of  $\mathbf{g}$  should approach each other  
302 asymptotically. Details on deriving those asymptotic standard errors (i.e., based on deriving  $\mathbf{C}^{gg}$ )  
303 for use in Equation [11] for these sparse prior specifications are provided in Supplementary File  
304 S1 such that we refer to these two corresponding GWA inference strategies as MAP-BayesA and  
305 MAP-SSVS.

306 For SSVS based single SNP inferences using MCMC, we based inferences on the PPA  
307 for SNP marker  $j$  (i.e.  $PPA_j$ ) as in Equation [15].

308 
$$PPA_j = \frac{\sum_{l=1}^N \tau_{j(l)}}{N} \quad [15]$$

309 Here  $N$  denotes the number of MCMC cycles saved for posterior inference and  $\tau_{j(l)}$  is a binary  
310 draw from the full conditional distribution of  $\tau_j$  at MCMC cycle  $l$ . We denote this GWA method  
311 as MCMC-SSVS.

312 Since there is no variable selection inherent with BayesA under MCMC, we based single  
313 SNP inferences on a Bayesian analog to a  $P$ -value using

$$314 \quad \hat{p}_j = 2 \min \left( \frac{\sum_{l=1}^N I(g_{j(l)} > 0)}{N}, 1 - \frac{\sum_{l=1}^N I(g_{j(l)} > 0)}{N} \right) \quad [16]$$

315 (Bello *et al.* 2010) where the indicator variable  $I(\cdot) = 1$  if the condition within the argument is  
 316 true and 0 otherwise. We denote this particular GWA method as MCMC-BayesA,

317

318 *Windows based associations*

319 Window-based extensions to all of the above tests were also developed, some based on  
 320 work previously presented above. Suppose that window  $k, k = 1, 2, 3, \dots, K$  contains  $n_k$  markers  
 321 such that  $\mathbf{Z}$  can be partitioned accordingly into  $\mathbf{Z} = [\mathbf{Z}_1 \quad \mathbf{Z}_2 \quad \dots \quad \mathbf{Z}_K]$  with  $\mathbf{Z}_k$  having  $n_k$   
 322 columns, implying then that window  $k$  contains  $n_k$  SNP markers. Similarly, the vector  $\mathbf{g}$  is  
 323 partitioned accordingly; i.e.  $\mathbf{g} = [\mathbf{g}'_1 \quad \mathbf{g}'_2 \quad \dots \quad \mathbf{g}'_K]'$  such that  $\mathbf{g}_k$  is of dimension  $n_k \times 1$ . Recall  
 324 that we denoted  $\mathbf{C}^{gg} = PEV(\tilde{\mathbf{g}})$ . For our proposed windows-based test, the key components of  
 325  $\mathbf{C}^{gg}$  can be partitioned into  $K$  different blocks along the block diagonal; i.e.,  $\mathbf{C}_1^{gg}, \mathbf{C}_2^{gg}, \dots, \mathbf{C}_K^{gg}$   
 326 where  $\mathbf{C}_k^{gg}$  is of dimension  $n_k \times n_k$ . The extension to a joint “fixed effects” or EMMAX like test  
 327 on  $n_k$  markers in window  $k$  involves the following extension of Equation [14].

$$328 \quad \chi_f^2 = \tilde{\mathbf{g}}_k (\mathbf{I}_{n_k} \sigma_g^2 - \mathbf{C}_k^{gg})^{-1} \tilde{\mathbf{g}}_k \quad [17]$$

329 That is, it can be readily demonstrated, extending results from Bernal Rubio *et al.* (2016), that  
 330  $\chi_f^2$  is chi-square distributed with  $n_k$  degrees of freedom under  $H_0: \mathbf{g}_k = 0$ . The corresponding  
 331 extension to a joint classical “random effects” or RRBLUP test on window  $k$  is provided in  
 332 Equation [18]

$$333 \quad \chi_r^2 = \tilde{\mathbf{g}}_k (\mathbf{C}_k^{gg})^{-1} \tilde{\mathbf{g}}_k \quad [18]$$

334 which would also be considered to be chi-square distributed with  $n_k$  degrees of freedom under  
 335  $H_0: \mathbf{g}_k = 0$ . Similarly, one could use Equation [18] to construct the same tests for MAP-BayesA

336 and MAP-SSVS but basing the  $\mathbf{C}^{gg}$  on the corresponding asymptotic posterior variance-  
 337 covariance matrices as derived in Supplementary File S1.

338 For windows based inference using MCMC-SSVS, we simply compute the PPA for  
 339 window  $k$  (i.e.  $PPA_k$ ) in Equation [19], following that presented in Fernando et al. (2014).

$$340 \quad PPA_k = \frac{\sum_{l=1}^N \left( I \left( \sum_{j=1}^{n_k} \tau_{kj(l)} > 0 \right) \right)}{N} \quad [19]$$

341 Here,  $\tau_{kj(l)}$  defines a binary draw from the full conditional distribution of  $\tau_j$  for SNP marker  $j$

342 located within window  $k$  drawn during MCMC cycle  $l$ . Note then that  $I \left( \sum_{j=1}^{n_k} \tau_{kj(l)} > 0 \right) > 0$  is equal to

343 1 when any of the draws of  $\tau_{kj(l)}$  within window  $k$  are equal to 1.

344 For windows based GWA inference under MCMC-BayesA, we propose inferring upon  
 345 the posterior probability of the proportion ( $q_w$ ) of the genetic variance explained by the markers  
 346 in a genomic window relative to the total genetic variance as proposed by Fernando and Garrick  
 347 (2013) and determined in the following manner. First note that the genotypic value that is  
 348 attributed to a genomic window  $k$  is defined as in Equation [20].

$$349 \quad \mathbf{a}_k = \mathbf{Z}_k \mathbf{g}_k \quad [20]$$

350 Then the variance explained by the window is defined as

$$351 \quad \sigma_{a_k}^2 = \frac{\mathbf{a}_k' \mathbf{a}_k}{n_k} - \left( \frac{\mathbf{1}' \mathbf{a}_k}{n_k} \right)^2. \quad [21]$$

352 Similarly, the total genetic variance is computed as

$$353 \quad \sigma_a^2 = \frac{\mathbf{a}' \mathbf{a}}{m} - \left( \frac{\mathbf{1}' \mathbf{a}}{m} \right)^2. \quad [22]$$

354 Hence, the proportion of genetic variance that is explained by marker in window  $k$  is defined as

355 
$$q_k = \frac{\sigma_{a_k}^2}{\sigma_a^2} . \quad [23]$$

356 Suppose that we deem genomic windows that explain more than 1% of the total genetic  
357 variance as being of potential interest. Hence, a variable selection modification of MCMC-  
358 BayesA can be simply be based on the proportion of MCMC samples for which the genetic  
359 variance ( $q_k$ ) for window  $k$  exceeds 0.01 (Fernando and Garrick 2013). One advantage of this  
360 approach is that it can be applied to any MCMC analyses based on a model where variable  
361 selection is not explicitly specified.

362

## 363 **Data**

### 364 *Simulation Study*

365 In order to compare the various models (RR, BayesA, and SSVS) and algorithms (MAP  
366 vs. MCMC), we simulated data based on the Michigan State University Pig Resource Population  
367 (MSUPRP) raised at the Michigan State University Swine Teaching and Research Farm, East  
368 Lansing, MI (Edwards *et al.* 2008) . We specifically started with the SNP markers chosen for  
369 analysis by Gualdron Duarte *et al.* (2014) which included 928 Duroc-Pietrain F2 crosses.  
370 Roughly 1/3 of these pigs were directly genotyped using the Illumina Porcine SNP60 beadchip  
371 (60K) whereas the remaining F2 animals with genotyped using a lower density 9K set but whose  
372 genotypes were subsequently imputed to the 60K set (Gualdron Duarte *et al.* 2013). Edits  
373 excluded animals with more than 10% of their SNP markers missing, excluding SNP markers  
374 with more than 10% of animals missing genotypes for those markers, and excluding SNPs with  
375 minor allele frequency (MAF) below 0.01 (Gualdron Duarte *et al.* 2014). Some adjacent  
376 markers were in complete LD with each other. To circumvent multicollinearity issues,  
377 particularly its role in generating multimodality in the MCMC generated posterior densities for  
378 some SNP markers (Calus *et al.* 2015), we randomly deleted one SNP within an adjacent pair in  
379 complete LD with each other before further analyses. After invoking this edit, 43,266 SNPs  
380 remained. The original data source can be downloaded at  
381 [https://msu.edu/~steibelj/JP\\_files/GBLUP.html](https://msu.edu/~steibelj/JP_files/GBLUP.html).



382 To simulate different but representative genetic architectures, we generated QTL effects  
383 from three different Gamma densities with demonstrably different values of shape ( $\gamma$ ) ranging  
384 from an effectively oligogenic density ( $\gamma = 0.18$ ) which effectively specifies relatively much  
385 fewer QTL with large effects to an effectively polygenic Gaussian density ( $\gamma = 3.00$ ) where most  
386 QTL have intermediate effects with symmetrically small and large effects on either side. A third  
387 intermediate value ( $\gamma = 1.48$ ) was also chosen. A good illustration of the gamma density of QTL  
388 effects based on these three different specifications for  $\gamma$  is provided in Figure 1. Note that this  
389 range in  $\gamma$  values for QTL effects has been reported for various traits in livestock based on  
390 previous empirical work (Hayes and Goddard 2001).

391 In addition to the distribution of QTL effects, we also conjectured that the number of  
392 QTLs ( $n_{qtl}$ ) may also influence GWA performance such that we considered  $n_{qtl} = 30, 90, \text{ or } 300$ .  
393 Hence, we simulated 10 replicated populations under each of the  $3 \times 3 = 9$  different scenarios  
394 pertaining to the 3 different values for each of  $\gamma$  and of  $n_{qtl}$ . Each of the 90 simulated datasets  
395 were based on utilization of the 43,266 SNP marker genotypes on the  $n = 922$  MSUPRP F2 pigs  
396 as previously described. Within each dataset, allelic substitution effects,  $\mathbf{g}_{qtl}$ , were simulated for  
397 each of the  $n_{qtl}$  randomly chosen SNP markers from the corresponding gamma distribution  
398 having shape  $\gamma$ , with a randomly chosen half of those effects multiplied by -1 as per Meuwissen  
399 *et al.* (2001). The corresponding genotypes  $\mathbf{Z}_{qtl}$  for QTL on these animals were then a  $n \times n_{qtl}$   
400 subset of the SNP genotype matrix  $\mathbf{Z}$  such that the cumulative genetic merit or true breeding  
401 values was determined as  $\mathbf{u}_{TRUE} = \mathbf{Z}_{qtl} \mathbf{g}_{qtl}$ . Phenotypes for animals were generated based on a  
402 heritability of 0.45 as estimated for 13<sup>th</sup>-week tenth rib backfat from this same dataset. Only the  
403 remaining (i.e., non-QTL) marker genotypes  $\mathbf{Z}_{-qtl}$  were used for all simulation study analyses.

404 In the simulation study, all parameters excluding  $v_\tau$  in BayesA were estimated using both  
405 MCMC and MAP. For MCMC, we ran 200,000 iterations, discarding the first 100,000 iterations  
406 as burn-in and basing inference on saving every 10 of the remaining 100,000 cycles for a total of  
407 10,000 samples from the posterior density. Using MAP, estimation of variance components ( $\boldsymbol{\theta}$ )  
408 for BayesA and SSVS was based on a convergence criterion of  $\frac{[\hat{\boldsymbol{\theta}}^{(k)} - \hat{\boldsymbol{\theta}}^{(k-1)}][\hat{\boldsymbol{\theta}}^{(k)} - \hat{\boldsymbol{\theta}}^{(k-1)}]}{[\hat{\boldsymbol{\theta}}^{(k)}]^\top [\hat{\boldsymbol{\theta}}^{(k)}]} < 10^{-6}$ .  
409 Based on our previous experience (Chen and Tempelman, 2015), we recognized that the

410 specification of starting values in MAP-SSVS and MAP-BayesA was important for genomic  
 411 prediction accuracy and, hence, likely important for GWA inferences as well. Strategies for  
 412 specifying starting values for  $\sigma_g^2$ ,  $\sigma_e^2$ ,  $\mathbf{g}$  and  $\boldsymbol{\tau}$  may pragmatically involve using REML and  
 413 RRBLUP inferences as in Chen and Tempelman (2015) since RRBLUP is not computationally  
 414 intensive. For MAP-BayesA, starting values were based on REML estimates  $\hat{\sigma}_{g(REML)}^2$  and

415  $\hat{\sigma}_{e(REML)}^2$  using  $\sigma_{g(0)}^2 = \frac{V_g - 2}{V_g} \hat{\sigma}_{g(REML)}^2$  for  $\sigma_g^2$ ,  $\mathbf{g}_0 = BLUP(\mathbf{g}) = \{g_{0j}\}_{j=1}^m$  for  $\mathbf{g}$  and

416  $\tau_{(0)j} = \frac{\frac{g_{0j}^2}{\sigma_{g(0)}^2} + V_g}{V_g - 1}$  for  $\tau_j, j = 1, 2, \dots, m$ , based on the posterior expectation derived from its full

417 conditional density. For MAP-SSVS, the corresponding starting values were  $\sigma_{g(0)}^2 = \frac{\hat{\sigma}_{g(REML)}^2}{\pi_0}$

418 for  $\sigma_g^2$  with the starting value  $\pi_{\tau(0)}$  for  $\pi_\tau$  based, in turn, on starting values for  $\tau_j$  (i.e., SNP-  
 419 specific PPA) which were determined in the following manner. First of all, EMMAX-based  $P$ -  
 420 values for each SNP were converted to local false discovery rate (lFDR) estimates using the R  
 421 package `ashr` (Stephens 2017). It has been demonstrated that these lFDR estimates, in turn,  
 422 can be used to approximate PPA using  $PPA \approx 1 - \text{lFDR}$  (Stephens 2017). These approximate PPA  
 423 values were then chosen as the starting values for  $\tau_j$  in MAP-SSVS. In turn, these starting values  
 424 for  $\tau_j$  were used to derive the starting value for  $\pi_0$  in MAP-SSVS using the posterior expectation

425 from its full conditional density, i.e.,  $\pi_0 = \frac{\alpha_0 + \sum_{j=1}^m \tau_j}{\alpha_0 + \beta_0 + m}$ . Upon convergence of variance

426 components using the AIREML procedure outlined in Chen and Tempelman (2015),  
 427 convergence of MAP-based solutions to  $\mathbf{g}$  were based on the same criteria.

428 Single SNP marker inferences were based on the procedures outlined previously; i.e. for  
 429 MAP by comparing  $z_r$  in Equation [12] for the random effect tests for RRBLUP, MAP-BayesA,  
 430 and MAP-SSVS and  $z_f$  for the EMMAX test in Equation [11] to a standard normal distribution.  
 431 No adjustment for multiple testing were invoked for the shrinkage based procedures (RRBLUP,  
 432 MAP-BayesA, and MAP-SSVS) as per Gelman *et al.* (2012) whereas a Bonferonni adjustment

433 based on the number of markers was invoked for EMMAX. Furthermore, the posterior means  
434 provided in Equations [15] and [16] were used for GWA under MCMC-SSVS and MCMC-  
435 BayesA, respectively. Since the remaining genotypes  $\mathbf{Z}_{-qtl}$  did not include the simulated QTL,  
436 SNP markers were declared as true positives if the QTL was located between it and its closest  
437 SNP neighbor on either side.

438 Window based inference was based on the procedures outlined previously; i.e. for MAP  
439 by computing  $\chi_r^2$  in Equation [18] for the random effect tests using RRBLUP, MAP-BayesA,  
440 and MAP-SSVS and  $\chi_f^2$  for fixed effects test in Equation [17] under EMMAX. These test  
441 statistics were compared to a chi-square distribution with degrees of freedom  $n_k$ . Similar to  
442 single marker tests, no multiple testing adjustments were incurred for  $\chi_r^2$  whereas a Bonferonni  
443 adjustment based on the total number of genomic windows was invoked for  $\chi_f^2$ . Furthermore,  
444 GWA was based on the PPA that  $q_k > 0.01$  as provided in Equation [23] for MCMC-BayesA  
445 and on the PPA for MCMC-SSVS as provided in Equation [19].

446 For windows-based inference, four alternative fixed window sizes were chosen: 0.5, 1, 2,  
447 or 3 Mb. The genome map used was the *Sus Scrofa* build 10.2  
448 ([http://www.ensembl.org/Sus\\_scrofa/Info/Index](http://www.ensembl.org/Sus_scrofa/Info/Index)). Also, as per Moser *et al.* (2015), two different  
449 within-chromosome starting positions (starting at location 0 or 0.25 Mb for window size 0.5;  
450 starting at 0 or 0.5 Mb location for window sizes 1 Mb; starting at 0 or 1 Mb location for window  
451 sizes 2Mb; and starting at 0 or 1.5 Mb location for window sizes 3Mb) for each chromosome  
452 were chosen to partly counteract the chance effect of different LD patterns being associated with  
453 non-overlapping windows. Finally, adaptive window sizes based on clustering SNP by LD  $r^2$   
454 were also determined implementing the BALD R package (Dehman and Neuvial 2015) using the  
455 procedure described by Dehman *et al.* (2015).

456 The relative performance of all methods and models were based on receiver operating  
457 characteristic (ROC) curves. In a ROC curve, the true positive rate (TPR) is plotted against the  
458 false positive rate (FPR) for each competing method (Metz 1978). We were more specifically  
459 interested in the partial area under the curve up until a FPR= of 5% (pAUC05) so as to not  
460 include somewhat irrelevant ROC regions with low levels of specificity (Ma *et al.* 2013). A

461 perfect classifier would have a pAUC05 of  $0.05 \times 1 = 0.05$  whereas a random classifier would  
462 have a pAUC05 of  $0.05^2/2 = 0.00125$ . We subsequently rescaled all pAUC05 measures by  
463  $0.00125^{-1}$  such that a random classifier is rescaled to a relative pAUC05 = 1. We used the R  
464 package `ROCR` (Sing *et al.* 2005) to obtain replicate-specific ROC curves and pAUC05 for each  
465 of the 10 replicated datasets for each method and window specification within each  $n_{qtl}$  and  $\gamma$   
466 combination. For each window specification, specific comparisons between methods were based  
467 on using the logarithm of pAUC05 as the response variable in a mixed model ANOVA with  
468 methods,  $n_{qtl}$  and  $\gamma$  and all of their interactions included as fixed effects and population replicate  
469 (nested within  $n_{qtl}$  and  $\gamma$ ) as a random effect blocking factor. For windows-based inferences  
470 based on fixed window sizes, replicate-specific pAUC05 values were averaged over the two  
471 different starting positions as previously noted. Mean  $\log(\text{pAUC05})$  estimates were  
472 backtransformed (i.e. anti-logged) to the original scale for reporting. Overall marginal means  
473 were separated using Tukey's test whereas comparisons between methods were sliced out using  
474 ANOVA *t*-tests for each value of  $n_{qtl}$  or  $\gamma$  if the corresponding interaction between these factors  
475 with methods were significant ( $P < 0.05$ ). We also conjecture that window size might actually  
476 influence of the power of detecting QTL using the same method; therefore, we conducted  
477 separate tests comparing pAUC05 for each of the different window sizes, including adaptively  
478 chosen windows based on BALD, separately within each method.

479

#### 480 *MSUPRP data*

481 We also compared all models and algorithms on 13-week tenth rib backfat (mm) within  
482 the MSUPRP data as per Gualdron Duarte *et al.* (2014). Sex, contemporary group, and age of  
483 slaughter were treated as fixed effects (i.e.,  $\beta$ ). We compared each of the six competing  
484 methods, computing either PPA or *P*-values in the same manner as in the simulation study. For  
485 MCMC-BayesA and MCMC-SSVS, we ran a total of 1 million MCMC iterations based on  
486 500,000 burn in iterations and 500,000 iterations post burn-in saving every 10 iterations such that  
487 posterior inference was based on 50,000 random draws from the posterior distribution. Since  
488 we did not know the true positions of the causal QTL for this trait, GWA inferences were  
489 compared between the various methods, based on PPA for MCMC-BayesA and MCMC-SSVS,

490 P-values for RRBLUP, MAP-BayesA, and MAP-SSVS, and Bonferroni adjusted P-values for  
491 EMMAX.

492

493

## RESULTS

### 494 *Simulation Study*

495 Overall mean comparisons between methods for pAUC05 based on single SNP  
496 inferences are provided in Table 1, noting that two-way interactions were not detected ( $P > 0.05$ )  
497 between methods with  $\gamma$  or with  $n_{qtl}$ . There was no evidence of a sizeable difference between any  
498 of the methods given that pAUC05 ranged from 2.52 to 2.77 times that for a random classifier,  
499 although MCMC-BayesA ranked lowest.

500 For fixed 1Mb window sizes (Table 2), the two-way interactions between method and  
501  $\gamma$  and between method and  $n_{qtl}$  were both significant ( $P < 0.0001$ ). Therefore, methods were  
502 compared separately for each different value of  $\gamma$  and of  $n_{qtl}$ . Nevertheless, MCMC-SSVS and  
503 MCMC-BayesA had the largest pAUC05 ( $P < 0.05$ ) for each different value of  $\gamma$  and of  $n_{qtl}$  as  
504 well as overall. EMMAX generally followed MCMC-SSVS and MCMC-BayesA with MAP-  
505 SSVS, MAP-BayesA and RRBLUP being the worst performing methods. Most notably, these  
506 latter three methods generally did worse than a random classifier (i.e. pAUC05  $< 1$ ) except for  
507 MAP-SSVS at  $n_{qtl} = 30$ .

508 Table 3 highlights the comparisons between the various methods using the adaptive  
509 window sizes inferred by BALD. Here, the two-way interaction between method and  $n_{qtl}$  was  
510 important ( $P < 0.05$ ) whereas the two-way interaction between method and  $\gamma$  was not; hence, we  
511 just compared different methods within each different value of  $n_{qtl}$ . As with the 1Mb window  
512 inferences, MCMC-SSVS and MCMC-BayesA had the highest pAUC05, followed by EMMAX  
513 within each different value of  $n_{qtl}$  such that these same rankings were found overall as well.  
514 Again, we found that MAP-SSVS, MAP-BayesA, and RRBLUP had lower pAUC05 compared  
515 to a random classifier except for MAP-SSVS when  $n_{qtl} = 30$ .

516 We were also interested in pAUC05 comparisons between different window length  
517 specifications. Recognizing that the interaction between method and window length was

518 important in our joint analysis involving all simulated datasets, we choose to focus on window  
519 length comparisons separately within each of MCMC-SSVS, MCMC-BayesA, and EMMAX  
520 (Table 4), given that all other methods performed worse than random classifier with windows  
521 based inference. For EMMAX, single SNP inferences has significantly larger pAUC05  
522 compared to inferences based on the longer genomic windows (2 and 3 Mb) with inference based  
523 on adaptively determined windows using BALD and shorter genomic windows (0.5Mb and 1Mb)  
524 being intermediate in their performance. Conversely, for both MCMC-BayesA and MCMC-  
525 SSVS, single SNP inference had the lowest pAUC05 whereas adaptively determined window  
526 selection based on BALD yielded the highest pAUC05 with fixed window inferences being  
527 intermediate in their performance. In fact, the best overall performance was based on using the  
528 two MCMC based methods with adaptively determined windows with a pAUC05 being over 5  
529 times greater than that of a random classifier.

530

### 531 ***MSUPRP Data***

532 Manhattan plots based on single SNP associations for 13-week tenth rib backfat (mm) in  
533 MSUPRP are provided in Figure 2. The statistically most significant marker identified by  
534 EMMAX was SNP label ALGA0104402 ( $P = 2.36e-10$ ) at location 136.0844Mb in  
535 Chromosome 6, marking the same location identified as being most significantly associated with  
536 this trait by Gualdron Duarte *et al.* (2014). Another 11 nearby statistically significant markers  
537 ranged in location from 132.60Mb to 138.24Mb with 1 marker (SNP label MARC0035827) at  
538 122.36Mb on Chromosome 6 being also statistically significant using EMMAX. For MCMC-  
539 SSVS, the marker (SNP label ALGA0122657) located at 136.0786Mb on Chromosome 6 had the  
540 highest PPA of 0.487 and was adjacent to the most significant marker ALGA0104402 as  
541 identified by EMMAX. MCMC-SSVS also inferred its second largest PPA=0.227 with SNP  
542 marker ALGA0104402. Hence, the top 2 SNP markers identified by MCMC-SSVS and  
543 EMMAX were the same, albeit their order of importance was reversed. Although the most  
544 significant single SNP associations were also determined within this same region for each of the  
545 four other methods, their levels of significance were clearly not important except perhaps for  
546 MAP-SSVS which started to approach statistical significance with SNP label MARC0035827  
547 ( $P=0.08$ ).



548 For windows-based inference, we focused on the adaptively chosen window strategy  
549 based on LD using BALD (Figure 3). For EMMAX, the most significant window ( $P = 9.36e-08$ )  
550 ranged from 134.17Mb to 134.75Mb on Chromosome 6. Although this region did not contain  
551 any markers that were statistically significant based on single SNP based inferences, it was very  
552 close to a marker (SNP label ASGA0029653) at 134.14Mb that was deemed to be statistically  
553 significant in Figure 2. Four other windows on Chromosome 6 were also significant, covering  
554 regions 129.70-131.35Mb, 132.87-134.14Mb, 135.19-136.84Mb and 136.97-137.32Mb. These  
555 windows included some statistically significant or nearly significant markers based on single  
556 SNP inferences in Figure 2. Using MCMC-SSVS, the most significant window (Window 909)  
557 covered 135.19-136.84Mb with a PPA = 0.722; this window also contained the most significant  
558 markers based on single SNP inferences using EMMAX and MCMC-SSVS in Figure 2. Window  
559 905 had the second highest PPA = 0.477 and ranged in location from 132.87-134.14Mb with all  
560 other windows having smaller PPA ( $< 0.2$ ). A LD heatmap of the genomic region containing  
561 both windows are provided in Figure 4, indicating that some SNP markers in Window 905 are in  
562 relatively high LD with markers in Window 909. These two windows also had the highest PPA  
563 under MCMC-BayesA being 0.459 and 0.553 respectively. For RRBLUP, MAP-BayesA and  
564 MAP-SSVS, no window was deemed to be statistically significant ( $P > 0.05$ ).

565

566

## DISCUSSION

567 The objectives of our study were multifaceted in that we wished to very broadly address  
568 the impact of a) prior specifications on marker effects, b) single marker associations versus  
569 associations based on different specifications for genomic windows and c) of computationally  
570 tractable but analytical approximations for GWA inference based on sparse priors. Although our  
571 simulation study was based on genotypes derived from a specific population (MSUPRP), a wide  
572 variety of potential genetic architectures were constructed on top of that framework based on  
573 different degrees of skewness of a Gamma distribution via different specifications of the shape  
574 parameter ( $\gamma$ ) for QTL effects as well as the number ( $n_{qtl}$ ) of QTL.

575 A majority of GWA studies have been conducted using single SNP inferences (Goddard  
576 and Hayes 2009; Visscher *et al.* 2012; Goddard *et al.* 2016). In this specific context, we

577 determined that the difference in pAUC05 between all methods were relatively small and  
578 unimportant even though MCMC-BayesA had significantly lower pAUC05 and hence worse  
579 GWA performance. However, for all windows based analyses, MCMC-BayesA and MCMC-  
580 SSVS had significantly greater pAUC05 than all other methods across all combinations of  $\gamma$  and  
581  $n_{qtl}$ , regardless of window size and whether these window sizes were fixed or adaptively inferred  
582 based on LD using the BALD software package. Conceptually, MCMC-BayesA might have even  
583 outperformed MCMC-SSVS for windows-based GWA as our comparisons may have been  
584 influenced by the arbitrariness of using 1% as a threshold for percentage of total genetic variance  
585 explained by a window when determining the PPA under MCMC-BayesA. That is, proper  
586 specification of such a threshold is likely to be density dependent. Admittedly, a BayesB like  
587 implementation (Meuwissen *et al.* 2001) could have captured the best features (i.e. variable  
588 selection and heavy-tailed priors) of both BayesA and SSVS. EMMAX typically ranked third  
589 whereas MAP implementations of BayesA and SSVS as well as RRBLUP did much more poorly  
590 for windows based association. The latter was not too surprising since previously Gualdrón  
591 Duarte *et al.* (2014) also determined that RRBLUP was extremely conservative for GWA in this  
592 same dataset. Furthermore, this liability of RRBLUP has been noted by others including Hayes  
593 (2013). We noted that the median and mean lengths for windows adaptively chosen by BALD  
594 software were 0.59Mb and 0.91Mb (Panel A in Figure S1 in Supplementary File S2),  
595 respectively, such that it was reasonable to expect adaptively chosen windows to lead to an  
596 GWA performance closest to inferences based on either based on the 0.5Mb or 1Mb fixed  
597 window sizes as we did observe for the two MCMC based procedures.

598         What was initially surprising to us was that the pAUC05 for the analytical “shrinkage”-  
599 based procedures, namely RRBLUP, MAP-SSVS and MAP-BayesA, under windows based  
600 inference was often worse than that of a random classifier (i.e. pAUC05<1). This, at first,  
601 seemed counterintuitive to us. Hence, we briefly investigated a scenario where the number of  
602 SNP markers per window was fixed to be 10 rather than basing window sizes on a fixed physical  
603 distance. Basing genomic windows on a fixed number of SNPs has been a strategy also  
604 considered elsewhere (Zhang *et al.* 2016). In our particular case, the average length of a 10 SNP  
605 window was 0.51 Mb such that one might anticipate that inference based on 10 SNP marker  
606 windows might be comparable to using inference based on fixed 0.5 Mb length windows.  
607 Nevertheless, we determined that 10 SNP windows based inference lead to a ROC performance



608 that was at least better than a random classifier for each of RRBLUP, MAP-SSVS and MAP-  
609 BayesA (Figure S2 in Supplementary File S2), conversely to what we observed previously to  
610 windows based on any fixed physical distance. This contrast in pAUC05 performance between  
611 fixed physical distance and fixed number of markers could be explained as follows. For the vast  
612 majority of windows based on either scenario (fixed number of markers or fixed physical  
613 distance), the P-values for the chi-square tests of these shrinkage based procedures were very  
614 large (i.e.,  $P > 0.85$ ). With inference based on a fixed number of SNP markers per window and  
615 random assignment of QTL to these markers, it was reasonable to expect that the pAUC05 of  
616 any of these procedures should be at least as large as a random classifier. However, with  
617 inference based on fixed physical distance in Mb or even adaptively determined based on LD  
618 relationships, the number of SNP markers and hence the degrees of freedom for each window-  
619 specific chi-square test is highly variable, ranging from 1 to 35 with 0.5Mb windows, for  
620 example. Hence regions with few markers are more likely to have smaller P-values than regions  
621 with many markers by nature of a greater penalty incurred with a larger degrees of freedom chi-  
622 square test statistic. Furthermore, lower P-value regions with fewer markers are also less likely  
623 to contain a QTL because of random assignment of QTL to markers throughout the genome such  
624 that regions with the smallest P-values would more likely include a greater than expected number  
625 of false positive results relative to a random classifier.

626 One possible strategy to mitigate this problem is through use of a likelihood ratio test for  
627 the variance component characterizing the variance attributable to markers within a window can  
628 be considered for EMMAX or the MAP based approaches as then the degrees of freedom for that  
629 test does not depend on the number of markers in that window (Wu *et al.* 2010; Wang *et al.*  
630 2013). Gualdrón Duarte *et al.* (2014) present details for such a likelihood ratio test; nevertheless,  
631 this approach requires one to refit the entire model each time that a particular window is being  
632 tested and hence can be computationally challenging.

633 We specifically determined that adaptive window specifications based on BALD worked  
634 best for both MCMC-BayesA and MCMC-SSVS with significantly higher mean pAUC05 than  
635 inferences based on fixed window lengths or single SNP markers. In fact, there was no evidence  
636 of differences in pAUC05 between GWA associations based on windows of constant sizes  
637 ranging from 0.5 to 3Mb when using either MCMC-BayesA or MCMC-SSVS. Hence adaptive

638 window clustering based on LD measures seems to be an important factor to consider when  
639 partitioning genomic windows, at least for Bayesian sparse prior specifications.

640 We have previously established that starting values are important for MAP-SSVS and  
641 MAP-BayesA (Chen and Tempelman 2015); in fact, we then demonstrated that starting marker  
642 effects at null values was very suboptimal, even though that is a common strategy for genomic  
643 prediction methods based on the use of the EM algorithm (Meuwissen *et al.* 2009; Karkkainen  
644 and Sillanpaa 2012). As we adapted in this study, a practical strategy is to base starting values  
645 on RRBLUP and genomic REML as we conducted in this study although we worried as to how  
646 suboptimal that might be, recognizing MAP estimates are asymptotic i.e.,  $\text{MAP}(\mathbf{g}) \rightarrow E(\mathbf{g} | \mathbf{y})$   
647 only as  $n \rightarrow \infty$  and such that  $n \gg m$ . Being components of the joint modal estimator of  $\boldsymbol{\beta}$  and  $\mathbf{g}$ ,  
648  $\text{MAP}(\mathbf{g})$  is particularly susceptible to the specification of starting values when  $m \gg n$ , as it  
649 becomes then increasingly likely that the joint posterior density of  $\boldsymbol{\beta}$  and  $\mathbf{g}$  is multimodal. In  
650 some classical animal breeding models used for non-Gaussian responses, asymptotic MAP  
651 estimators work well, i.e.,  $\text{MAP}(\mathbf{g}) \rightarrow E(\mathbf{g} | \mathbf{y})$ , when  $n \gg m$  (Kizilkaya *et al.* 2002) where  $m$ ,  
652 more generally, refers to the number of random effects. Conversely, MAP may be expected to  
653 perform very poorly when  $m \gg n$  (Ramirez-Valverde *et al.* 2001). In the context of GWA, this  
654 asymptotic inference problem of MAP would only be expected to further exacerbate with much  
655 denser SNP marker panels (i.e., increasing  $m$ ) as used in many GWA studies.

656 To further assess whether starting values based on RRBLUP and genomic REML  
657 estimates might lead to suboptimal GWA inferences, we also based starting values for MAP-  
658 SSVS and MAP-BayesA on posterior mean estimates derived from their MCMC counterparts,  
659 focusing only, however, on single SNP and adaptive window inference. We recognize that this  
660 would not be a practical MAP strategy as once MCMC based inferences are obtained, then  
661 asymptotic MAP based inferences would not have any extra value. As anticipated from our  
662 previous genomic prediction work (Chen and Tempelman 2015), using MCMC based starting  
663 values for MAP-SSVS lead to a larger pAUC05 compared to the use of RRBLUP or genomic  
664 REML starting values except for no evidence of a difference at  $n_{qtl} = 300$  (Table S5 in  
665 Supplementary File S2). However, for adaptively determined windows, even MAP-SSVS  
666 inferences based on MCMC based starting values were no better than a random classifier except  
667 for when  $n_{qtl} = 30$ . Similar results for comparing different sets of starting values (MCMC-

668 BayesA vs BLUP) for MAP-BayesA are provided in Table S6 in Supplementary File S2. These  
669 supplementary results further illustrate how precarious is the use of MAP based procedures for  
670 Bayesian regression GWA analyses; again, we would believe the sensitivity of MAP to starting  
671 values would only be greater with the use of high density marker panels.

672 As our GWA inference for MCMC-SSVS was based on PPA (i.e.  $\text{Prob}(\tau_j = 1|\mathbf{y})$ ), it  
673 might seem reasonable to specify GWA inference for MAP-SSVS in a similar manner; i.e., using  
674 the E-step values of  $\tau_j$  at convergence as estimates of PPA. However, we noted that these E-step  
675 values uniformly drifted either towards 0 or 1 such that there were never any intermediate  
676 estimates of PPA. A comparison of PPA based on  $\tau_j$  for  $\text{Prob}(\tau_j = 1|\mathbf{y})$  for MCMC-SSVS  
677 versus the E-step values of  $\tau_j$  at convergence on the MSUPRP data is provided is given in  
678 Panel A of Figure S3 in Supplementary File S2. Also, recall that the MAP-procedure is sensitive  
679 to starting values and that starting values for MAP-SSVS were based on RRBLUP as this might  
680 be a pragmatic and reasonable strategy in most cases. If we had based starting values on, say,  
681 their MCMC-SSVS posterior means, one would notice a different assortment of converged E-  
682 step values of  $\tau_j$  compared to what we observed with RRBLUP starting values as we  
683 demonstrate with the MSUPRP data in Panel B of Figure S3.

684 Recall that for MAP-SSVS, we based starting values for the SNP specific PPA on  
685 estimated local false discovery rates (lFDR) using the R package `ashr` since there is presumably  
686 a close relationship between them; i.e.,  $\text{PPA} \approx 1 - \text{lFDR}$  (Stephens 2017). This procedure  
687 converts  $P$ -values to lFDR such that we based lFDR determinations from the  $P$ -values computed  
688 under EMMAX. This begged the question as to whether PPA could be simply based on lFDR  
689 processing of EMMAX  $P$ -values. However, upon comparing 1-lFDR estimated from the  
690 EMMAX  $P$ -values to PPA estimated using MCMC-SSVS of the MSUPRP data, it appeared that  
691 there was not generally very good agreement between the two sets of PPA estimates except for  
692 the some near-zero PPA and the largest PPA estimated using both procedures (Figure S4 in  
693 Supplementary File S2).

694 We also wondered if the strategy for computing window-based PPA could be simplified  
695 further from that presented in Fernando *et al.* (2014) and used in this paper (i.e., Equation [19])

696 to that suggested by Moser *et al.* (2015) who simply summed SNP specific PPA (i.e., based on  
697 Equation [15]) within a window to determine the window-based PPA. One should anticipate that  
698 the approach of Moser *et al.* (2015) should lead to higher estimated PPA. We compared the two  
699 PPA determination approaches for pAUC05 in the simulation study and noted that there was  
700 significant interaction between PPA determination approach with  $\gamma$  and  $n_{qtl}$  but no significant  
701 interaction involving window size; hence we compared the two strategies within each value of  $\gamma$   
702 and  $n_{qtl}$  averaged across window length (Table S7 in Supplementary File S2). The only  
703 significant difference in pAUC05 occurred with  $\gamma=3$  and  $n_{qtl}=300$  for which the approach of  
704 Fernando *et al.* (2014) lead to a higher pAUC05. Nevertheless, since point estimates of pAUC05  
705 were always larger using the approach from Fernando *et al.* (2014), we would recommend their  
706 approach from Equation [19] for the determination of windows based PPA.

707 We did not estimate  $v_\tau$  using either the procedures outlined in Yang *et al.* (2015) for  
708 MCMC-BayesA or provided in Chen and Tempelman (2015) for MAP-BayesA primarily because  
709 of the extremely poor MCMC mixing for sampling this hyperparameter and its poor convergence  
710 in MAP-BayesA. A typical specification for  $v_\tau$  in BayesA is 4 or 5 (Colombani *et al.* 2013;  
711 Perez and de los Campos 2014). The specification of  $v_\tau = 2.5$  that we chose for this paper was  
712 based in part on results from Yang *et al.* (2015) and Nadaf *et al.* (2012) who determined that  
713 lower specifications of  $v_g$  (i.e., heavier tails) could lead to higher genomic prediction accuracies  
714 when using Bayes A. To assess this further, we compared MCMC-BayesA using  $v_\tau = 2.5$   
715 versus  $v_\tau = 5$  for pAUC05 based on the BALD derived adaptive window inference. In general,  
716 the use of  $v_\tau = 2.5$  yielded a higher mean pAUC05 than  $v_\tau = 5$  except for a non-significant  
717 difference at  $n_{qtl}=300$  (Table B4). For large scale empirical analyses whereby hyperparameter  
718 inference seems daunting, researchers should consider conducting analyses based on a finite  
719 number of hyperparameter specifications, choosing those specifications that lead to the best  
720 cross-validation prediction accuracy. Similar arguments could be made for choosing the key  
721 hyperparameters in other Bayesian regression models. It is worth noting that even we ran our  
722 MCMC algorithm for 1 million iterations, the mixing of the MCMC chain was still rather poor as  
723 it pertained to inference on other hyperparameters. For example, for MCMC-BayesA, the

724 effective sample size (ESS) for  $\sigma_g^2$  was estimated to be 66.33 whereas for SSVS, the ESS was  
725 61.03 for  $\sigma_g^2$  and 53.48 for  $\pi_r$ .

726 It should be apparent that given that MCMC-SSVS is a natural variable selection model,  
727 it might be favored over MCMC-BayesA which is not a natural variable selection model. Our  
728 strategy for computing the proportion of genetic variance explained by each window and  
729 determining the posterior probability that that percentage exceeds an arbitrary threshold (1% in  
730 our analyses) is based on the strategy presented by Fernando and Garrick (2013). The flexibility  
731 of MCMC modeling allows posterior probabilities (i.e., PPA) of this nature to be computed.  
732 However, one should be wary of the impact of the threshold since it obviously should depend  
733 upon marker density. That is, if the threshold is set to be too high, then sensitivity is lost. Based  
734 on the results from both simulation study and real data analysis, we demonstrated that random  
735 effects modeling can also be powerful tool for GWA as long as the suitable priors, i.e., in our  
736 case sparser priors, are used. Other variable selection implementations popularized in WGP  
737 including BayesB (Meuwissen *et al.* 2001) or BayesR (Erbe *et al.* 2012; Moser *et al.* 2015) could  
738 be considered as well.

739 Our MSUPRP application was interesting in that we discovered that SNP markers in two  
740 different blocks can be in high LD even when they're not adjacent to each other. However, we  
741 would quickly note that these strange LD patterns may be due to genome assembly errors in the  
742 pig genome (Groenen 2016) with particular issues having been identified in the Chromosome 6  
743 region (Warr *et al.* 2015) which contained the strongest associations in our study. This may  
744 somewhat complicate strategies for single SNP specific or even window-based inference. We  
745 also recognize that there is a movement towards the use of multi-SNP haplotype modeling which  
746 may improve GWA performance (Cuyabano *et al.* 2014). Our adaptive window based strategy  
747 seems to improve the performance of GWA relative to single SNP or fixed window length  
748 inference although, conceivably, there may be other better ways to group SNPs. With marker  
749 densities well beyond 50K, the adaptive window strategy might not be viable since it requires the  
750 computation and storage of matrix of LD  $r^2$  values between every SNP marker within a  
751 chromosome before clustering analyses can be used to partition the genome into windows.  
752 Fernando *et al.* (2014) also suggested that PPA based on Bayesian GWA analyses similar to our  
753 MCMC-SSVS be based on whether non-zero associations were found not only in that marker's

754 resident window but also in either of the two flanking windows. Their strategy was based on  
755 fixed window sizes such that it may be worthwhile to consider their flanking strategy in the  
756 context of adaptively chosen window sizes. We conjecture that if LD structure is appropriately  
757 used to partition the genome, the use of such flanking windows might not be necessary; however,  
758 this should be a topic for future research. It is also important to note that the comparisons in this  
759 paper are context specific in terms of the genomic LD relationships germane to a F2 cross in  
760 pigs. This naturally leads to a higher pairwise LD between adjacent SNP markers than what  
761 might be found in outbreeding populations, and most notably humans. This naturally would  
762 change the relative comparisons between single SNP versus windows based inferences as well as  
763 the relative number and sizes of adaptively chosen windows based on LD relationships. Hence  
764 future investigation of our approaches in other populations is strongly warranted.

765 In summary, we found Bayesian variable selection to be a promising strategy for GWA  
766 when combined with window based inference. Nevertheless, it seems prudent that window  
767 selection be carefully chosen using rules based on LD information rather than predetermined  
768 constant physical window lengths (in Mb) for genomic regions. Also, recently proposed  
769 analytical approaches for Bayesian regression models should be discouraged for GWA studies.

770

771

## ACKNOWLEDGMENTS

772 We are indebted to the group of Dr. Cathy Ernst for making this data available. We are also  
773 grateful to Jose-Luis Gualdron Duarte and Yeni Bernal Rubio for their assistance in preparing  
774 the data. This project was supported by Agriculture and Food Research Initiative Competitive  
775 Grants no. 2011-77015-30338 and 2004-35604-14580 from the United States Department of  
776 Agriculture National Institute of Food and Agriculture.

777

778

## REFERENCES

- 779 Andrews, D. F., and C. L. Mallows, 1974 Scale mixtures of normal distributions. *J R Stat Soc Series B*  
780 *Methodol* 36: 99-102.
- 781 Bello, N. M., J. P. Steibel and R. J. Tempelman, 2010 Hierarchical Bayesian modeling of random and  
782 residual variance-covariance matrices in bivariate mixed effects models. *Biom J* 52: 297-313.
- 783 Bernal Rubio, Y. L., J. L. Gualdron Duarte, R. O. Bates, C. W. Ernst, D. Nonneman *et al.*, 2016 Meta-  
784 analysis of genome-wide association from genomic prediction models. *Anim. Genet.* 47: 36-48.



- 785 Calus, M. P., J. Vandenplas and J. Ten Napel, 2015 Ever-growing data sets pose (new) challenges to  
786 genomic prediction models. *J. Anim. Breed. Genet.* 132: 407-408.
- 787 Chen, C., and R. J. Tempelman, 2015 An integrated approach to empirical Bayesian whole genome  
788 prediction modeling. *J. Agric. Biol. Environ. Stat.* 20: 491-511.
- 789 Colombani, C., A. Legarra, S. Fritz, F. Guillaume, P. Croiseau *et al.*, 2013 Application of Bayesian least  
790 absolute shrinkage and selection operator (LASSO) and BayesCpi methods for genomic selection  
791 in French Holstein and Montbeliarde breeds. *J. Dairy Sci.* 96: 575-591.
- 792 Cuyabano, B. C., G. Su and M. S. Lund, 2014 Genomic prediction of genetic merit using LD-based  
793 haplotypes in the Nordic Holstein population. *BMC Genomics* 15: 1171.
- 794 de Los Campos, G., J. M. Hickey, R. Pong-Wong, H. D. Daetwyler and M. P. Calus, 2013 Whole-  
795 genome regression and prediction methods applied to plant and animal breeding. *Genetics* 193:  
796 327-345.
- 797 Dehman, A., C. Ambroise and P. Neuvial, 2015 Performance of a blockwise approach in variable  
798 selection using linkage disequilibrium information. *BMC Bioinformatics* 16: 148.
- 799 Dehman, A., and P. Neuvial, 2015 BALD: Blockwise Approach using Linkage Disequilibrium  
800 information. R package version 0.2.1.
- 801 Edwards, D. B., C. W. Ernst, N. E. Raney, M. E. Doumit, M. D. Hoge *et al.*, 2008 Quantitative trait locus  
802 mapping in an F2 Duroc x Pietrain resource population: II. Carcass and meat quality traits. *J.*  
803 *Anim. Sci.* 86: 254-266.
- 804 Erbe, M., B. J. Hayes, L. K. Matukumalli, S. Goswami, P. J. Bowman *et al.*, 2012 Improving accuracy of  
805 genomic predictions within and between dairy cattle breeds with imputed high-density single  
806 nucleotide polymorphism panels. *J. Dairy Sci.* 95: 4114-4129.
- 807 Fan, B., S. K. Onteru, Z. Q. Du, D. J. Garrick, K. J. Stalder *et al.*, 2011 Genome-wide association study  
808 identifies Loci for body composition and structural soundness traits in pigs. *PLoS One* 6: e14726.
- 809 Fernando, R., and D. Garrick, 2013 Bayesian Methods Applied to GWAS, pp. 237-274 in *Genome-Wide*  
810 *Association Studies and Genomic Prediction*, edited by C. Gondro, J. van der Werf and B. Hayes.  
811 Humana Press.
- 812 Fernando, R. L., A. Toosi, D. J. Garrick and J. C. M. Dekkers, 2014 Application of whole-genome  
813 prediction methods for genome-wide association studies: a Bayesian approach. in *Proceedings of*  
814 *the 10th World Congress of Genetics Applied to Livestock Production*, Vancouver.
- 815 Gelman, A., 2006 Prior distributions for variance parameters in hierarchical models (Comment on an  
816 Article by Browne and Draper). *Bayesian Analysis* 1: 515-533.
- 817 Gelman, A., J. Hill and M. Yajima, 2012 Why we (Usually) don't have to worry about multiple  
818 comparisons. *J Res Educ Effectiveness* 5: 189-211.
- 819 George, E. I., and R. E. McCulloch, 1993 Variable selection via Gibbs sampling. *J Amer Statist Assoc*  
820 88: 881 - 889.
- 821 Goddard, M. E., and B. J. Hayes, 2009 Mapping genes for complex traits in domestic animals and their  
822 use in breeding programmes. *Nat. Rev. Genet.* 10: 381-391.
- 823 Goddard, M. E., K. E. Kemper, I. M. MacLeod, A. J. Chamberlain and B. J. Hayes, 2016 Genetics of  
824 complex traits: prediction of phenotype, identification of causal polymorphisms and genetic  
825 architecture. *Proc Biol Sci* 283.
- 826 Groenen, M. A., 2016 A decade of pig genome sequencing: a window on pig domestication and  
827 evolution. *Genet Sel Evol* 48: 23.
- 828 Gualdron Duarte, J. L., R. O. Bates, C. W. Ernst, N. E. Raney, R. J. Cantet *et al.*, 2013 Genotype  
829 imputation accuracy in a F2 pig population using high density and low density SNP panels. *BMC*  
830 *Genet.* 14: 38.
- 831 Gualdron Duarte, J. L., R. J. Cantet, R. O. Bates, C. W. Ernst, N. E. Raney *et al.*, 2014 Rapid screening  
832 for phenotype-genotype associations by linear transformations of genomic evaluations. *BMC*  
833 *Bioinformatics* 15: 246.
- 834 Guan, Y., and M. Stephens, 2011 Bayesian variable selection regression for genome-wide association  
835 studies and other large-scale problems. *Ann Appl Stat* 5: 1780-1815.

- 836 Hayashi, T., and H. Iwata, 2010 EM algorithm for Bayesian estimation of genomic breeding values. *BMC*  
837 *Genet.* 11: 3.
- 838 Hayes, B., 2013 Overview of statistical methods for genome-wide association Studies (GWAS), pp. 149-  
839 169 in *Genome-Wide Association Studies and Genomic Prediction*, edited by C. Gondro, J. van  
840 der Werf and B. Hayes. Humana Press.
- 841 Hayes, B., and M. E. Goddard, 2001 The distribution of the effects of genes affecting quantitative traits in  
842 livestock. *Genet Sel Evol* 33: 209-229.
- 843 Kang, H. M., J. H. Sul, S. K. Service, N. A. Zaitlen, S. Y. Kong *et al.*, 2010 Variance component model  
844 to account for sample structure in genome-wide association studies. *Nat. Genet.* 42: 348-354.
- 845 Kang, H. M., N. A. Zaitlen, C. M. Wade, A. Kirby, D. Heckerman *et al.*, 2008 Efficient control of  
846 population structure in model organism association mapping. *Genetics* 178: 1709-1723.
- 847 Karkkainen, H. P., and M. J. Sillanpaa, 2012 Back to basics for Bayesian model building in genomic  
848 selection. *Genetics* 191: 969-987.
- 849 Kemper, K. E., C. M. Reich, P. J. Bowman, C. J. Vander Jagt, A. J. Chamberlain *et al.*, 2015 Improved  
850 precision of QTL mapping using a nonlinear Bayesian method in a multi-breed population leads  
851 to greater accuracy of across-breed genomic predictions. *Genet Sel Evol* 47: 29.
- 852 Kizilkaya, K., B. D. Banks, P. Carnier, A. Albera, G. Bittante *et al.*, 2002 Bayesian inference strategies  
853 for the prediction of genetic merit using threshold models with an application to calving ease  
854 scores in Italian Piemontese cattle. *J. Anim. Breed. Genet.* 119: 209-220.
- 855 Lippert, C., J. Listgarten, Y. Liu, C. M. Kadie, R. I. Davidson *et al.*, 2011 FaST linear mixed models for  
856 genome-wide association studies. *Nat Methods* 8: 833-835.
- 857 Louis, T. A., 1982 Finding the observed information matrix when using the EM algorithm. *J R Stat Soc*  
858 *Series B Methodol* 44: 226-233.
- 859 Ma, H., A. I. Bandos, H. E. Rockette and D. Gur, 2013 On use of partial area under the ROC curve for  
860 evaluation of diagnostic performance. *Stat. Med.* 32: 3449-3458.
- 861 Metz, C. E., 1978 Basic principles of ROC analysis. *Semin. Nucl. Med.* 8: 283-298.
- 862 Meuwissen, T. H., T. R. Solberg, R. Shepherd and J. A. Woolliams, 2009 A fast algorithm for BayesB  
863 type of prediction of genome-wide estimates of genetic value. *Genet Sel Evol* 41: 2.
- 864 Meuwissen, T. H. E., B. J. Hayes and M. E. Goddard, 2001 Prediction of total genetic value using  
865 genome-wide dense marker maps. *Genetics* 157: 1819-1829.
- 866 Moser, G., S. H. Lee, B. J. Hayes, M. E. Goddard, N. R. Wray *et al.*, 2015 Simultaneous discovery,  
867 estimation and prediction analysis of complex traits using a Bayesian mixture model. *PLoS Genet*  
868 11: e1004969.
- 869 Nadaf, J., V. Riggio, T. P. Yu and R. Pong-Wong, 2012 Effect of the prior distribution of SNP effects on  
870 the estimation of total breeding value. *BMC Proc* 6 Suppl 2: S6.
- 871 Perez, P., and G. de los Campos, 2014 Genome-wide regression and prediction with the BGLR statistical  
872 package. *Genetics* 198: 483-495.
- 873 Ramirez-Valverde, R., I. Misztal and J. K. Bertrand, 2001 Comparison of threshold vs linear and animal  
874 vs sire models for predicting direct and maternal genetic effects on calving difficulty in beef  
875 cattle. *J. Anim. Sci.* 79: 333-338.
- 876 Robinson, G. K., 1991 That BLUP is a good thing: the estimation of random effects. *Statist. Sci.* 6: 15-32.
- 877 Schmid, K., and Z. Yang, 2008 The trouble with sliding windows and the selective pressure in BRCA1.  
878 *PLoS One* 3: e3746.
- 879 Searle, S. R., G. Casella and C. E. McCulloch, 1992 *Variance components*. Wiley, New York.
- 880 Sing, T., O. Sander, N. Beerenwinkel and T. Lengauer, 2005 ROCr: visualizing classifier performance in  
881 R. *Bioinformatics* 21: 3940-3941.
- 882 Sorensen, D., and D. Gianola, 2002 *Likelihood, Bayesian, and MCMC methods in quantitative genetics*.  
883 Springer-Verlag, New York.
- 884 Stephens, M., 2017 False discovery rates: a new deal. *Biostatistics* 18: 275-294.
- 885 Strandén, I., and D. J. Garrick, 2009 Technical note: Derivation of equivalent computing algorithms for  
886 genomic predictions and reliabilities of animal merit. *J. Dairy Sci.* 92: 2971-2975.



- 887 Sun, X., L. Qu, D. J. Garrick, J. C. Dekkers and R. L. Fernando, 2012 A fast EM algorithm for BayesA-  
888 like prediction of genomic breeding values. *PLoS One* 7: e49157.
- 889 Tempelman, R. J., 2015 Statistical and computational challenges in whole genome prediction and  
890 genome-wide association analyses for plant and animal breeding. *J. Agric. Biol. Environ. Stat.*  
891 20: 442-466.
- 892 VanRaden, P. M., 2008 Efficient methods to compute genomic predictions. *J. Dairy Sci.* 91: 4414-4423.
- 893 Verbyla, K., B. Hayes, P. Bowman and M. Goddard, 2009 Accuracy of genomic selection using  
894 stochastic search variable selection in Australian Holstein Friesian dairy cattle. *Genet. Res.* 91:  
895 307 - 311.
- 896 Visscher, P. M., M. A. Brown, M. I. McCarthy and J. Yang, 2012 Five years of GWAS discovery. *Am. J.*  
897 *Hum. Genet.* 90: 7-24.
- 898 Wang, X., N. J. Morris, X. Zhu and R. C. Elston, 2013 A variance component based multi-marker  
899 association test using family and unrelated data. *BMC Genet.* 14: 17.
- 900 Warr, A., C. Robert, D. Hume, A. L. Archibald, N. Deeb *et al.*, 2015 Identification of Low-Confidence  
901 Regions in the Pig Reference Genome (Sscrofa 10.2). *Frontiers in Genetics* 6.
- 902 Wellcome Trust Case Control, C., 2007 Genome-wide association study of 14,000 cases of seven  
903 common diseases and 3,000 shared controls. *Nature* 447: 661-678.
- 904 Wiggans, G. R., T. A. Cooper, C. P. Van Tassell, T. S. Sonstegard and E. B. Simpson, 2013 Technical  
905 note: Characteristics and use of the Illumina BovineLD and GeneSeek Genomic Profiler low-  
906 density bead chips for genomic evaluation. *J. Dairy Sci.* 96: 1258-1263.
- 907 Wolc, A., J. Arango, P. Settar, J. E. Fulton, N. P. O'Sullivan *et al.*, 2016 Mixture models detect large  
908 effect QTL better than GBLUP and result in more accurate and persistent predictions. *J Anim Sci*  
909 *Biotechnol* 7: 7.
- 910 Wolc, A., J. Arango, P. Settar, J. E. Fulton, N. P. O'Sullivan *et al.*, 2012 Genome-wide association  
911 analysis and genetic architecture of egg weight and egg uniformity in layer chickens. *Anim.*  
912 *Genet.* 43 Suppl 1: 87-96.
- 913 Wu, M. C., P. Kraft, M. P. Epstein, D. M. Taylor, S. J. Chanock *et al.*, 2010 Powerful SNP-set analysis  
914 for case-control genome-wide association studies. *Am. J. Hum. Genet.* 86: 929-942.
- 915 Yang, W., C. Chen and R. J. Tempelman, 2015 Improving the computational efficiency of fully Bayes  
916 inference and assessing the effect of misspecification of hyperparameters in whole-genome  
917 prediction models. *Genet Sel Evol* 47: 13.
- 918 Yang, W., and R. J. Tempelman, 2012 A Bayesian antedependence model for whole genome prediction.  
919 *Genetics* 190: 1491-1501.
- 920 Zhang, X., D. Lourenco, I. Aguilar, A. Legarra and I. Misztal, 2016 Weighting Strategies for Single-Step  
921 Genomic BLUP: An Iterative Approach for Accurate Calculation of GEBV and GWAS. *Front*  
922 *Genet* 7: 151.
- 923 Zhou, X., and M. Stephens, 2012 Genome-wide efficient mixed-model analysis for association studies.  
924 *Nat. Genet.* 44: 821-824.

925

926 **Table 1:** Overall mean relative (random classifier = 1) partial areas under a receiving operating  
927 characteristic curve up until a false positive rate of 5% (pAUC05) for different methods on single SNP  
928 associations

|                | Methods              |                   |                   |                      |                   |                   |
|----------------|----------------------|-------------------|-------------------|----------------------|-------------------|-------------------|
|                | MCMC-<br>SSVS        | MCMC-<br>BayesA   | EMMAX             | MAP-<br>SSVS         | MAP-<br>BayesA    | RRBLUP            |
| Mean<br>pAUC05 | 2.61 <sup>a, b</sup> | 2.52 <sup>b</sup> | 2.77 <sup>a</sup> | 2.69 <sup>a, b</sup> | 2.76 <sup>a</sup> | 2.73 <sup>a</sup> |

929 Values not sharing the same letter have different ( $P < 0.05$ ) relative pAUC05. Mean estimates based on 10  
930 replicates per each of 9 populations of 3 x 3 factorial on number (30, 100, or 300) of quantitative trait loci  
931 (QTL), and shape parameter (0.18, 1.48, or 3.00) for Gamma distribution of QTL effects.

932

933 **Table 2:** Least squares mean relative (random classifier = 1) partial areas under a receiving operating  
 934 characteristic curve up until a false positive rate of 5% (pAUC05) for different methods for associations  
 935 based on genomic windows of length 1Mb. Comparisons are made within different specifications of  
 936 shape parameter ( $\gamma$ ) for Gamma distribution of quantitative trait loci (QTL) and number of QTL ( $n_{qtl}$ )

| Methods                |                   |                   |                   |                     |                       |                     |
|------------------------|-------------------|-------------------|-------------------|---------------------|-----------------------|---------------------|
| Factors                | MCMC-<br>SSVS     | MCMC-<br>BayesA   | EMMAX             | MAP-SSVS            | MAP-BayesA            | RRBLUP              |
| Shape $\gamma$         |                   |                   |                   |                     |                       |                     |
| 0.18                   | 2.82 <sup>a</sup> | 2.75 <sup>a</sup> | 1.78 <sup>b</sup> | 0.74 <sup>c,*</sup> | 0.63 <sup>c,*</sup>   | 0.48 <sup>d,*</sup> |
| 1.48                   | 4.22 <sup>a</sup> | 4.16 <sup>a</sup> | 2.54 <sup>b</sup> | 0.69 <sup>c,*</sup> | 0.38 <sup>d,*</sup>   | 0.28 <sup>e,*</sup> |
| 3                      | 4.63 <sup>a</sup> | 5.01 <sup>a</sup> | 2.47 <sup>b</sup> | 0.67 <sup>c,*</sup> | 0.40 <sup>d,*</sup>   | 0.24 <sup>e,*</sup> |
| <i>n<sub>qtl</sub></i> |                   |                   |                   |                     |                       |                     |
| 30                     | 6.81 <sup>a</sup> | 7.28 <sup>a</sup> | 3.63 <sup>b</sup> | 1.69 <sup>c</sup>   | 0.67 <sup>d,*</sup>   | 0.31 <sup>e,*</sup> |
| 90                     | 3.89 <sup>a</sup> | 3.78 <sup>a</sup> | 2.14 <sup>b</sup> | 0.61 <sup>c,*</sup> | 0.47 <sup>c,d,*</sup> | 0.37 <sup>d,*</sup> |
| 300                    | 2.08 <sup>a</sup> | 2.08 <sup>a</sup> | 1.42 <sup>b</sup> | 0.33 <sup>c,*</sup> | 0.31 <sup>c,*</sup>   | 0.29 <sup>c,*</sup> |
| Overall                | 3.81 <sup>a</sup> | 3.86 <sup>a</sup> | 2.23 <sup>b</sup> | 0.70 <sup>c,*</sup> | 0.46 <sup>d,*</sup>   | 0.32 <sup>e,*</sup> |

937 Values not sharing the same letter within a row have different ( $P < 0.05$ ) relative pAUC05 within the row.  
 938 \* indicates the corresponding method is not better than a random classifier. Mean estimates based on 10  
 939 replicates per each of 9 populations of 3 x 3 factorial on number (30, 100, or 300) of quantitative trait loci  
 940 (QTL), and shape parameter (0.18, 1.48, or 3.00) for Gamma distribution of QTL effects.

941

942 **Table 3:** Least squares mean relative (random classifier = 1) partial areas under a receiving operating  
 943 characteristic curve up until a false positive rate of 5% (pAUC05) for different methods for associations  
 944 based on genomic windows adaptively chosen by the BALD software package. Comparisons are made  
 945 within different specifications of number of quantitative trait loci ( $n_{qtl}$ )

| $n_{qtl}$ | Methods           |                   |                   |                     |                     |                     |
|-----------|-------------------|-------------------|-------------------|---------------------|---------------------|---------------------|
|           | MCMC-<br>SSVS     | MCMC-<br>BayesA   | EMMAX             | MAP-<br>SSVS        | MAP-<br>BayesA      | RRBLUP              |
| 30        | 8.83 <sup>a</sup> | 9.03 <sup>a</sup> | 3.57 <sup>b</sup> | 1.76 <sup>c</sup>   | 0.87 <sup>d,*</sup> | 0.29 <sup>e,*</sup> |
| 90        | 5.34 <sup>a</sup> | 4.98 <sup>a</sup> | 2.13 <sup>b</sup> | 0.8 <sup>c,*</sup>  | 0.50 <sup>d,*</sup> | 0.38 <sup>d,*</sup> |
| 300       | 3.89 <sup>a</sup> | 3.17 <sup>a</sup> | 1.30 <sup>b</sup> | 0.66 <sup>c,*</sup> | 0.62 <sup>c,*</sup> | 0.58 <sup>c,*</sup> |
| Overall   | 5.68 <sup>a</sup> | 5.22 <sup>a</sup> | 2.15 <sup>b</sup> | 0.97 <sup>c,*</sup> | 0.65 <sup>d,*</sup> | 0.40 <sup>e,*</sup> |

946 Values not sharing the same letter within a row have different ( $P < 0.05$ ) relative pAUC05 within the row.  
 947 \* indicates the corresponding method is not better than a random classifier. Mean estimates based on 10  
 948 replicates per each of 9 populations of 3 x 3 factorial on number (30, 100, or 300) of quantitative trait loci  
 949 (QTL), and shape parameter (0.18, 1.48, or 3.00) for Gamma distribution of QTL effects.

950

951

952

953

954

955 **Table 4:** Least squares mean relative (random classifier = 1) partial areas under a receiving operating  
 956 characteristic curve up until a false positive rate of 5% (pAUC05) between different window sizes within  
 957 each of EMMAX, MCMC-BayesA, and MCMC-SSVS.

| EMMAX      |                      | MCMC-BayesA |                   | MCMC-SSVS  |                   |
|------------|----------------------|-------------|-------------------|------------|-------------------|
| Window     | pAUC05               | Window      | pAUC05            | Window     | pAUC05            |
| Single SNP | 2.76 <sup>a</sup>    | Single SNP  | 2.52 <sup>c</sup> | Single SNP | 2.61 <sup>c</sup> |
| 0.5Mb      | 2.43 <sup>a, b</sup> | 0.5Mb       | 3.77 <sup>b</sup> | 0.5Mb      | 3.65 <sup>b</sup> |
| 1Mb        | 2.23 <sup>b, c</sup> | 1Mb         | 3.86 <sup>b</sup> | 1Mb        | 3.81 <sup>b</sup> |
| 2Mb        | 1.95 <sup>c</sup>    | 2Mb         | 3.93 <sup>b</sup> | 2Mb        | 3.94 <sup>b</sup> |
| 3Mb        | 1.85 <sup>c</sup>    | 3Mb         | 3.93 <sup>b</sup> | 3Mb        | 4.04 <sup>b</sup> |
| Adaptive   | 2.15 <sup>b, c</sup> | Adaptive    | 5.22 <sup>a</sup> | Adaptive   | 5.67 <sup>a</sup> |

958

959 Values not sharing the same letter within a column have different (P <0.05) relative pAUC05 within the  
 960 column. \* indicates the corresponding method is not better than a random classifier. Mean estimates based  
 961 on 10 replicates per each of 9 populations of 3 x 3 x 5 factorials on number (30, 100, or 300) of quantitative  
 962 trait loci (QTL), shape parameter (0.18,1.48, or 3.00) for Gamma distribution of QTL effects, and genomic  
 963 region size (single SNP, 0.5Mb, 1Mb, 2Mb, 3Mb or adaptively determined) for genome wide association.

964

965

966

967

968

## Figures

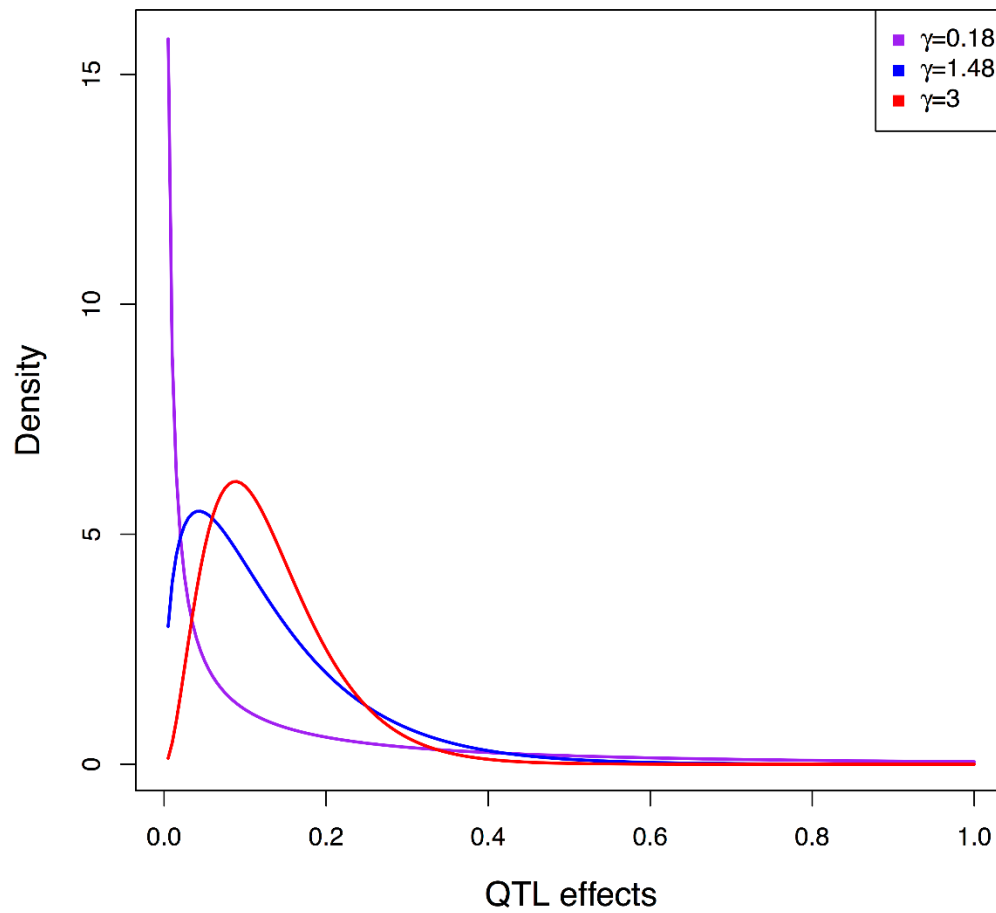

969

970 **Figure 1.** Distribution of quantitative trait loci effects under a Gamma distribution for different  
971 specifications of shape (magenta curve  $\gamma = 0.18$ , blue curve  $\gamma = 1.48$  and red curve  $\gamma = 3.00$ )

972

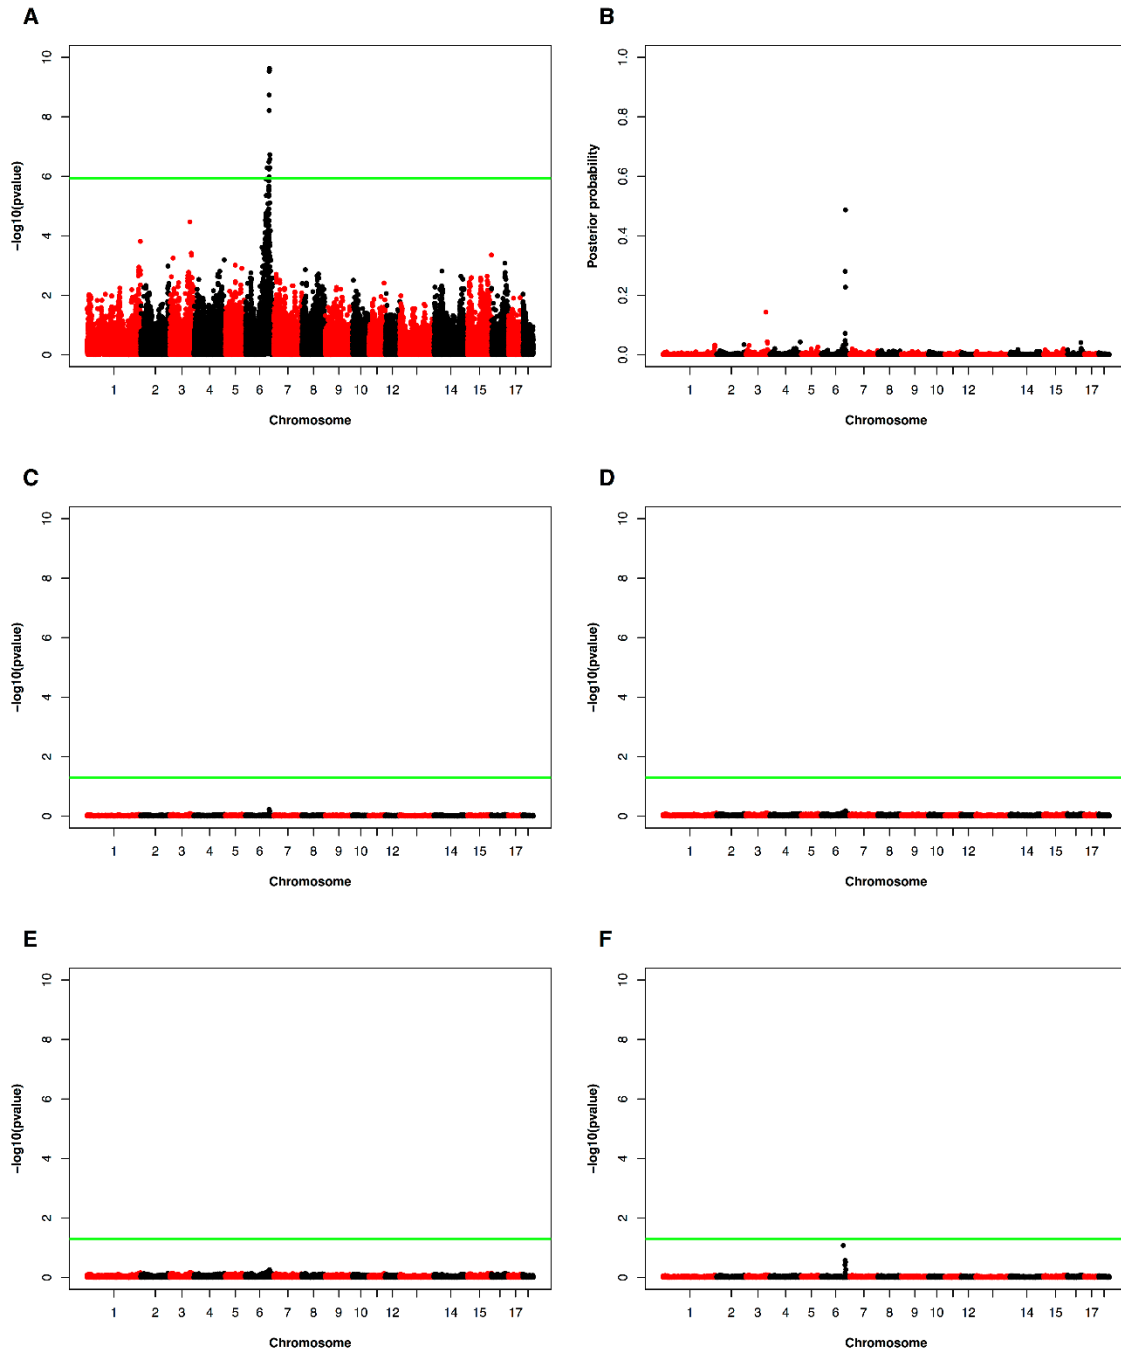

973

974 **Figure 2.** Manhattan plots for single SNP analysis on 13<sup>th</sup> week 10<sup>th</sup> rib backfat in Duroc Pietrain F2  
975 cross ( $n = 922$  pigs) based on different methods (Panel A: EMMAX, Panel B: MCMC-SSVS, Panel C:  
976 MCMC-BayesA, Panel D: RRBLUP, Panel E: MAP-BayesA and Panel F: MAP-SSVS)



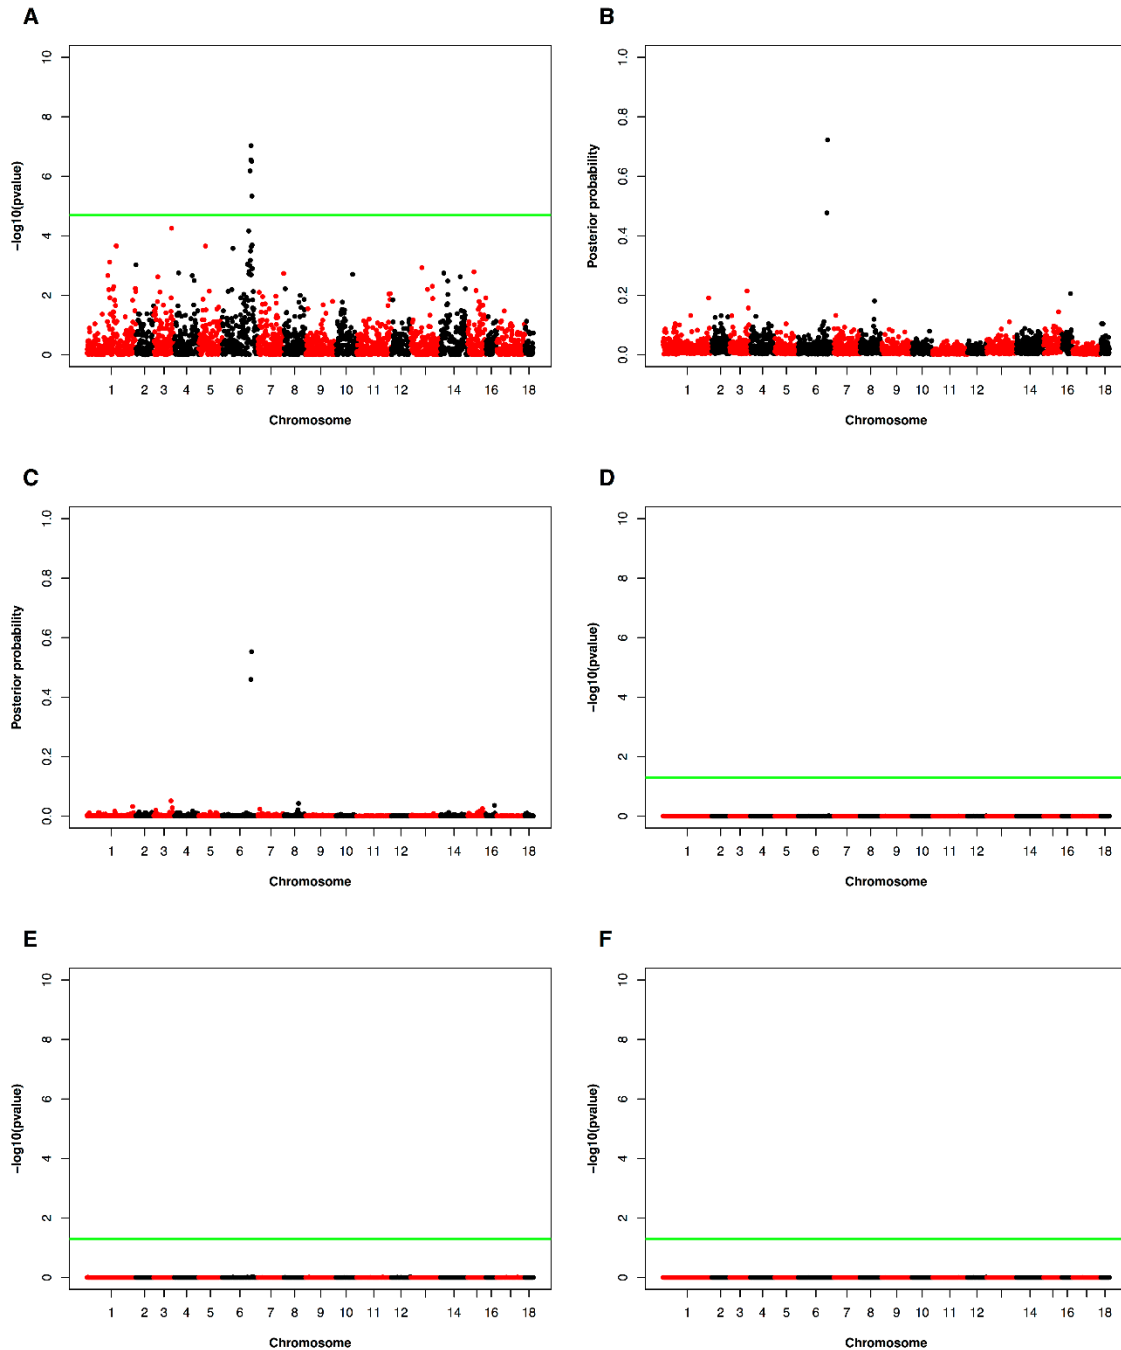

977

978 **Figure 3.** Manhattan plots for genomic window based associations on 13<sup>th</sup> week 10<sup>th</sup> rib backfat in Duroc  
979 Pietrain F2 cross ( $n = 922$  pigs) based on different methods (Panel A: EMMAX, Panel B: MCMC-SSVS,  
980 Panel C: MCMC-BayesA, Panel D: RRBLUP, Panel E: MAP-BayesA and Panel F: MAP-SSVS) under  
981 adaptive window inference.

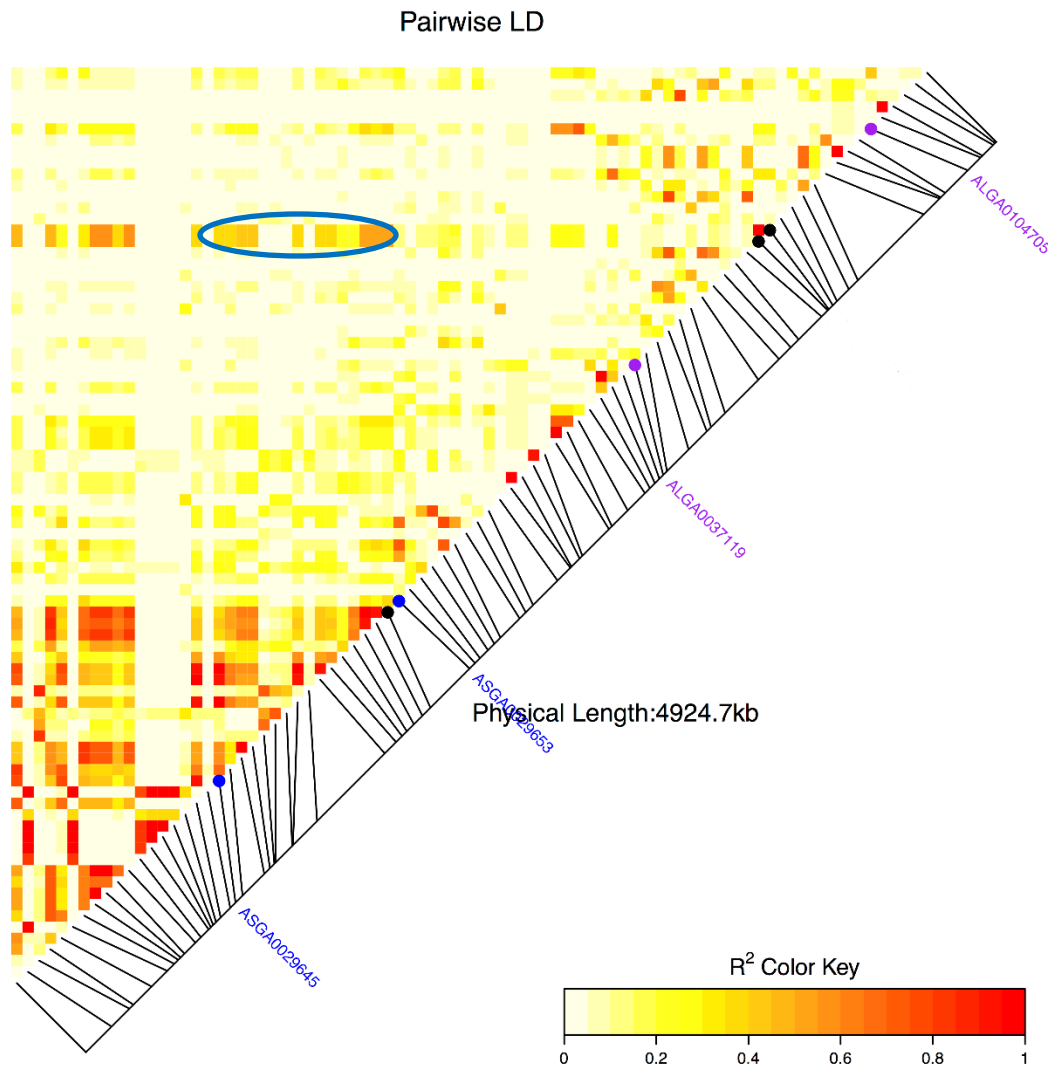

982

983 **Figure 4.** Linkage disequilibrium ( $r^2$  metric) heatmap for genomic region containing Windows 905 - 909  
984 on Chromosome 6 as adaptively determined by BALD software. Blue dots are starting and ending points for  
985 window 905 whereas purple dots are starting and ending points for window 909. Black dots are the 3  
986 markers at 133.9292Mb, 136.0786Mb and 136.0844Mb that are top 3 SNPs by MCMC-SSVS. The blue  
987 oval is used to highlight a pocket of higher  $r^2$  measures SNP markers in windows 905 and 909.
